# Supplementary material for: Synthesis, spectroscopic characterization and DNA/HSA binding studies of (phenyl/naphthyl)ethenyl-substituted 1,3,4-oxadiazolyl-1,2,4-oxadiazoles
Source: Royal Society of Chemistry journal article supplement (doi:10.1039/d0nj04530f), 2020-11-24
Supplement: d0nj04530f1.pdf [file d0nj04530f1.pdf]

## Supplementary Information

### Synthesis, spectroscopic characterization and DNA/HSA binding study of (phenyl/naphthyl)ethenyl-substituted 1,3,4-oxadiazolyl-1,2,4- oxadiazoles

João C. P. Mayer,<sup>a</sup> Thiago V. Acunha,<sup>b</sup> Oscar E. D. Rodrigues,<sup>a</sup> Davi F. Back,<sup>c</sup> Otávio Augusto Chaves,<sup>d</sup> Luciano Dornelles<sup>a\*</sup> and Bernardo A. Iglesias<sup>b\*\*</sup>

<sup>a</sup> Departamento de Química, LabSelen-NanoBio, Universidade Federal de Santa Maria, CEP 97105-900, Santa Maria, RS, Brazil.

<sup>b</sup> Departamento de Química, Laboratório de Bioinorgânica e Materiais Porfirínicos, Universidade Federal de Santa Maria, CEP 97105-900, Santa Maria, RS, Brazil.

<sup>c</sup> Laboratório de Materiais Inorgânicos - Departamento de Química, CCNE, UFSM, Santa Maria – RS, Brazil, Zip Code 97105-900.

<sup>d</sup> Instituto SENAI de Inovação em Química Verde, Rua Morais e Silva N° 53, Bloco 09, CEP 20271030, Rio de Janeiro, RJ, Brazil.

#### Table of Contents

|                                                                                              |     |
|----------------------------------------------------------------------------------------------|-----|
| <sup>1</sup> H and <sup>13</sup> C NMR spectra of compounds <b>7aa-be</b> .....              | S2  |
| HRMS spectra of compounds <b>7aa-be</b> .....                                                | S12 |
| X-Ray data of Compound <b>7aa</b> .....                                                      | S22 |
| UV-Vis absorption analysis of <b>7aa-ae</b> and <b>7ba-be</b> .....                          | S25 |
| Steady-state emission fluorescence analysis of <b>7aa-ae</b> and <b>7ba-be</b> .....         | S27 |
| UV-Vis titration absorption spectra of <b>7ab-ae</b> and <b>7bb-be</b> with CT-DNA .....     | S29 |
| Competitive emission spectra of EB-DNA with derivative <b>7ab-ae</b> and <b>7bb-be</b> ..... | S33 |
| HSA-binding emission spectra with derivative <b>7ab-ae</b> and <b>7bb-be</b> .....           | S38 |

**$^1\text{H}$  and  $^{13}\text{C}$  NMR spectra of compounds 7aa-be.**

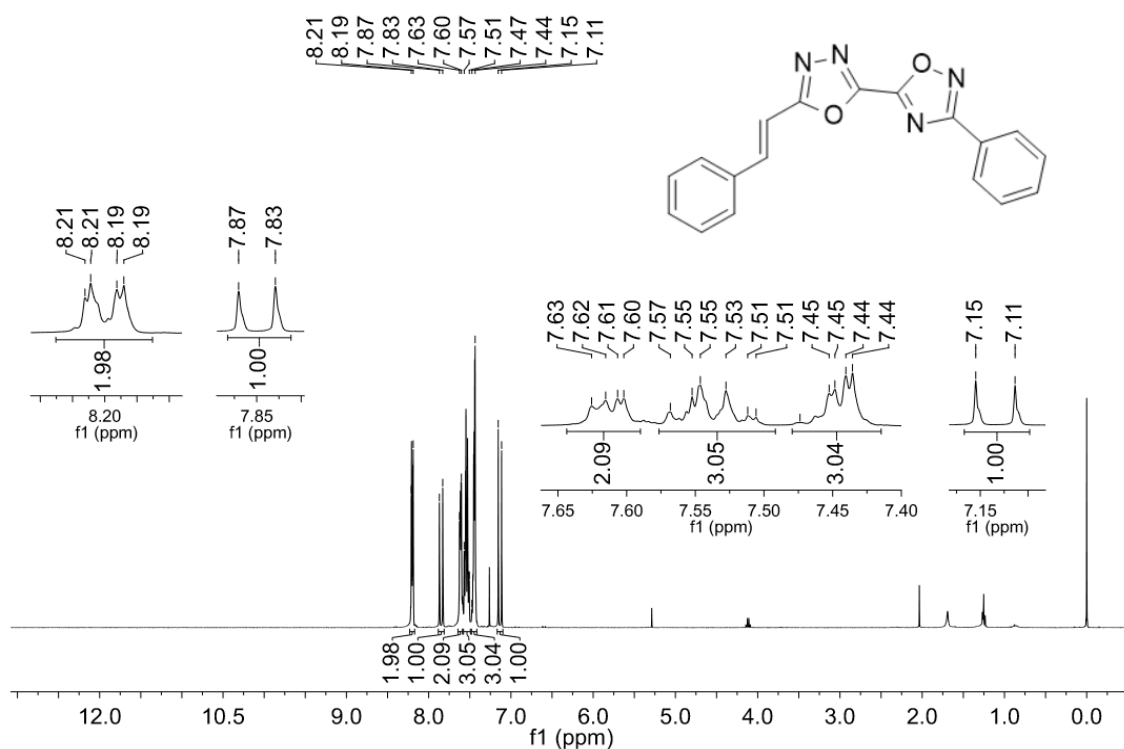

**Figure S1.**  $^1\text{H}$  NMR spectrum ( $\text{CDCl}_3$  at 400 MHz) of compound 7aa.

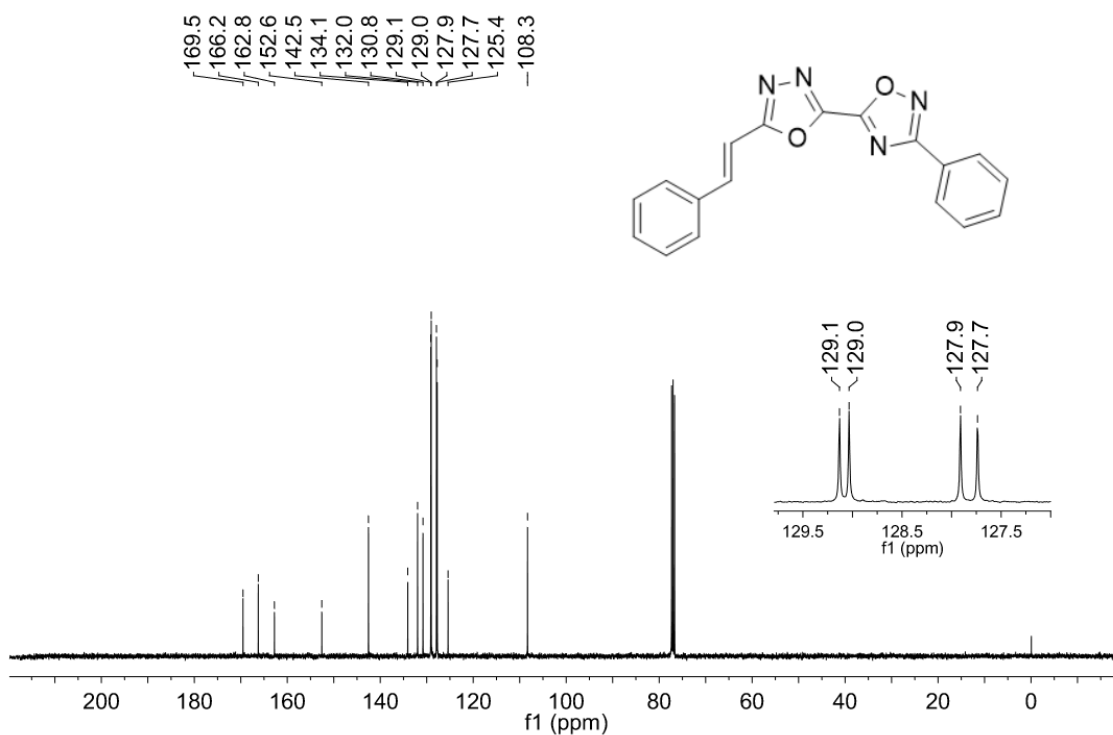

**Figure S2.**  $^{13}\text{C}$  NMR spectrum ( $\text{CDCl}_3$  at 100 MHz) of compound 7aa.

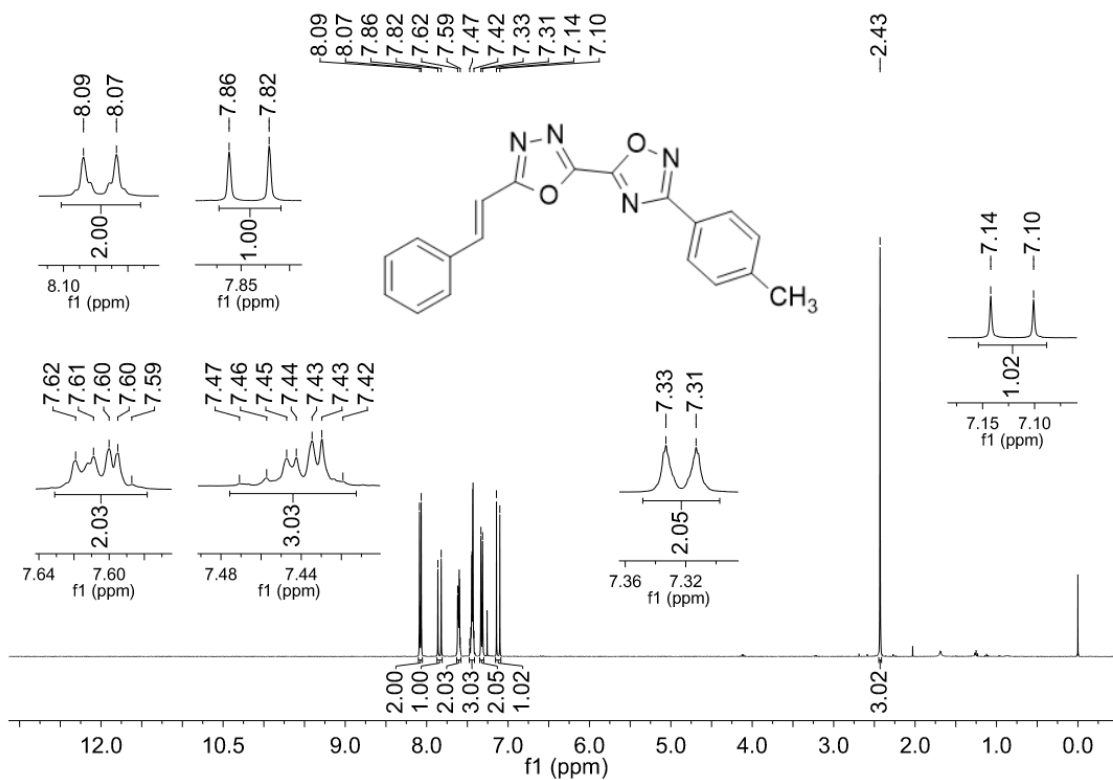

**Figure S3.** <sup>1</sup>H NMR spectrum (CDCl<sub>3</sub> at 400 MHz) of compound **7ab**.

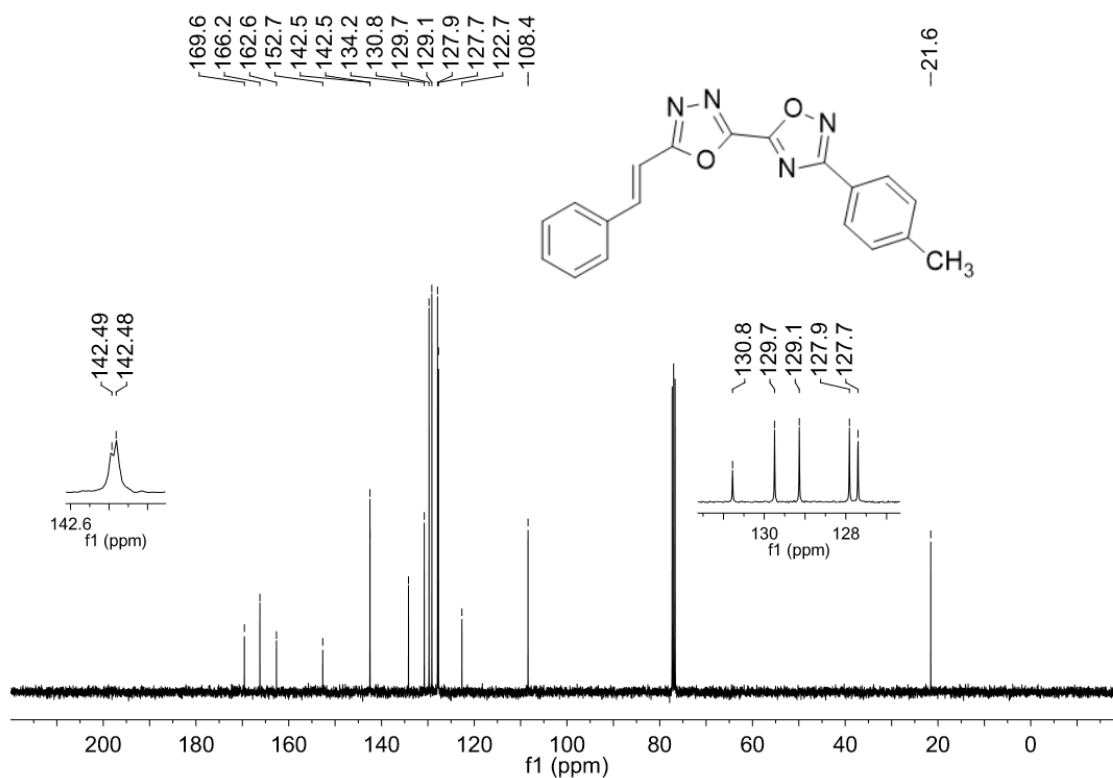

**Figure S4.** <sup>13</sup>C NMR spectrum (CDCl<sub>3</sub> at 100 MHz) of compound **7ab**.

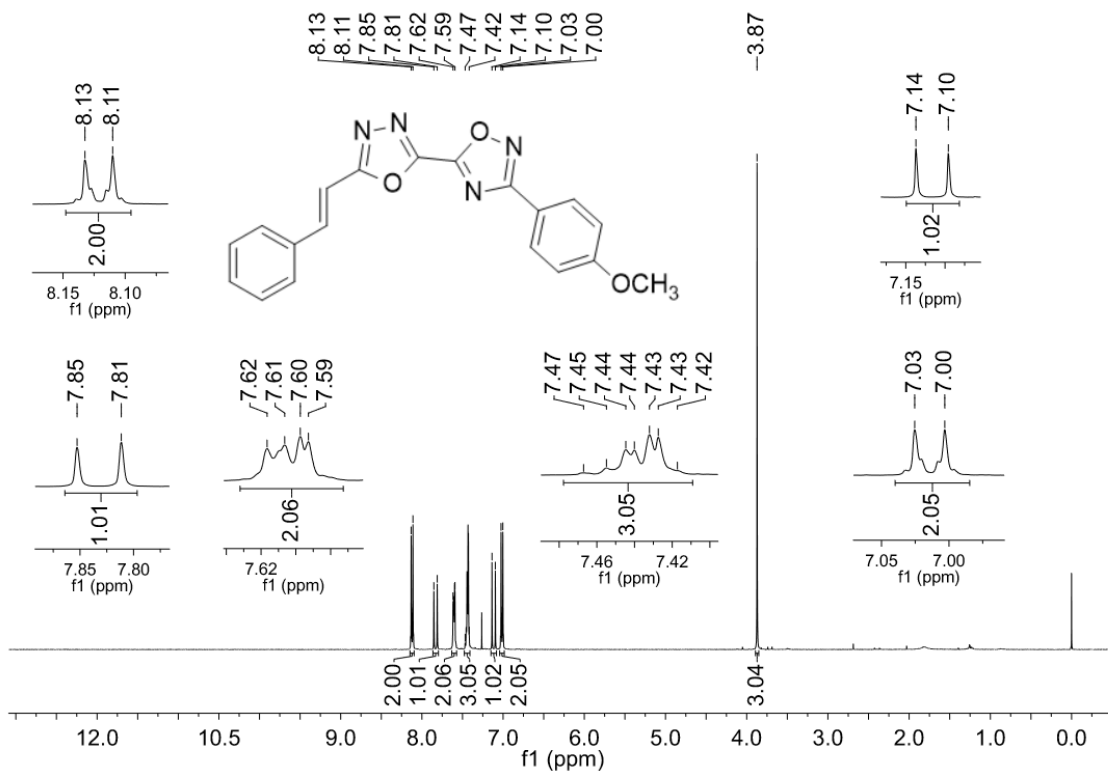

**Figure S5.** <sup>1</sup>H NMR spectrum (CDCl<sub>3</sub> at 400 MHz) of compound **7ac** (δ, TMS).

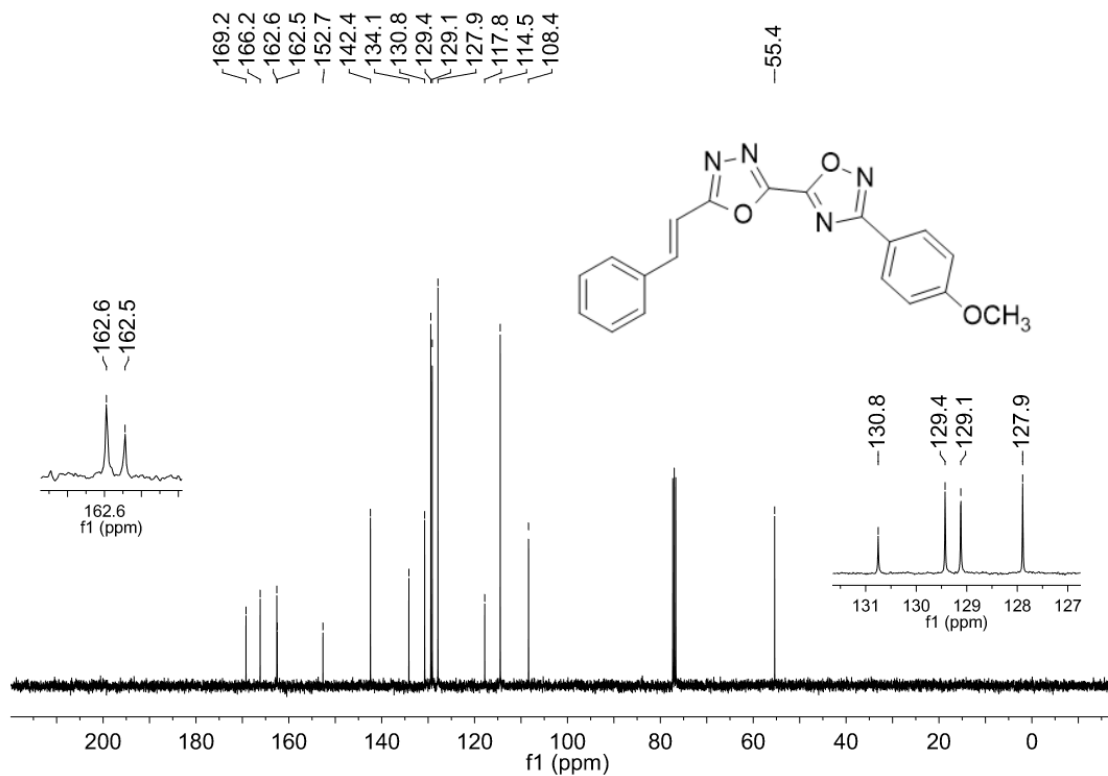

**Figure S6.** <sup>13</sup>C NMR spectrum (CDCl<sub>3</sub> at 100 MHz) of compound **7ac**.

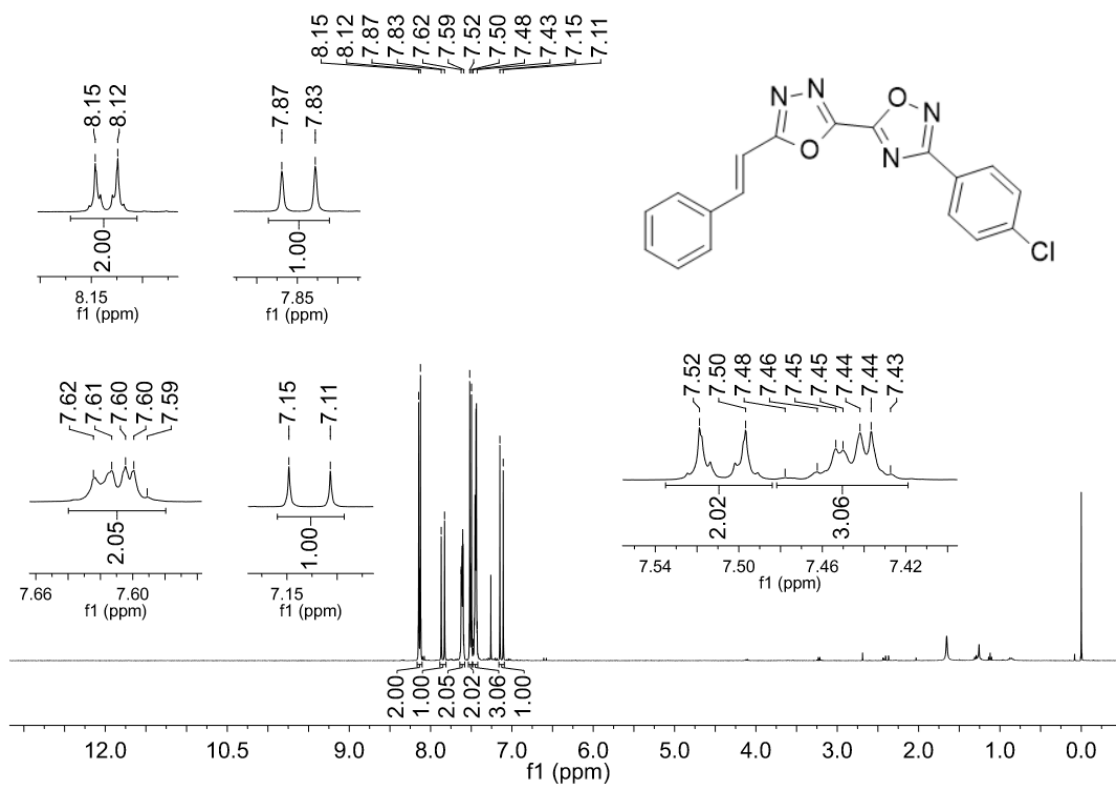

**Figure S7.** <sup>1</sup>H NMR spectrum (CDCl<sub>3</sub> at 400 MHz) of compound **7ad**.

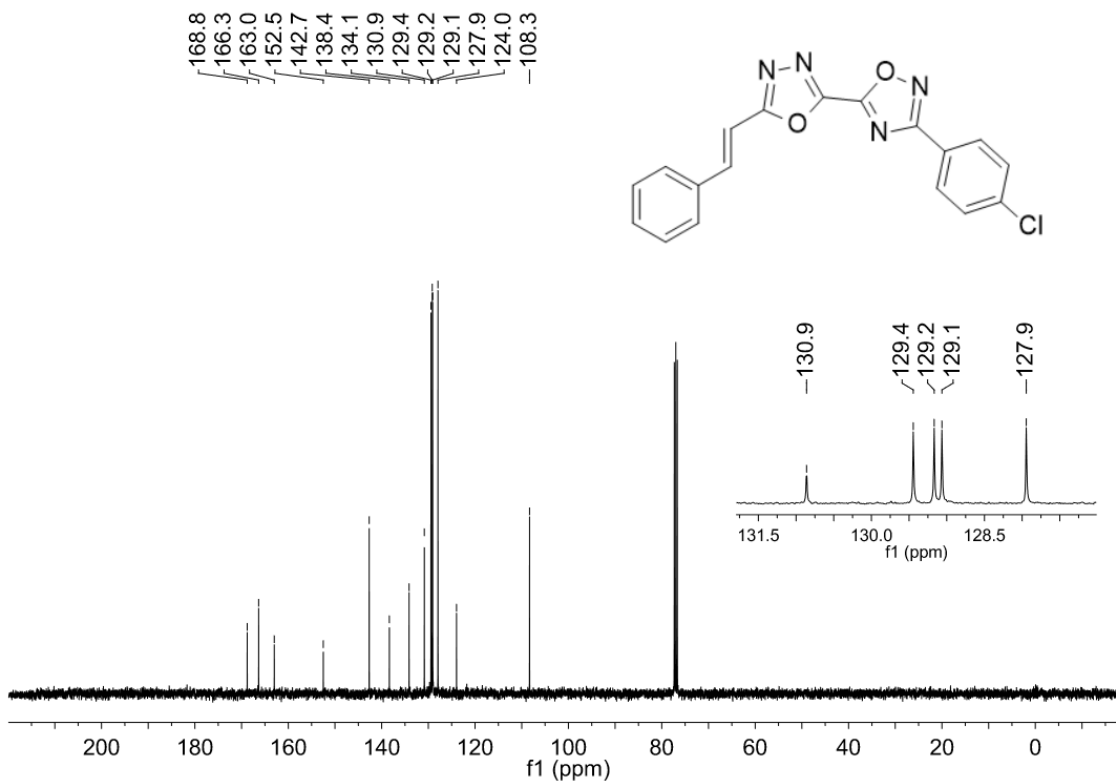

**Figure S8.** <sup>13</sup>C NMR spectrum (CDCl<sub>3</sub> at 100 MHz) of compound **7ad**.

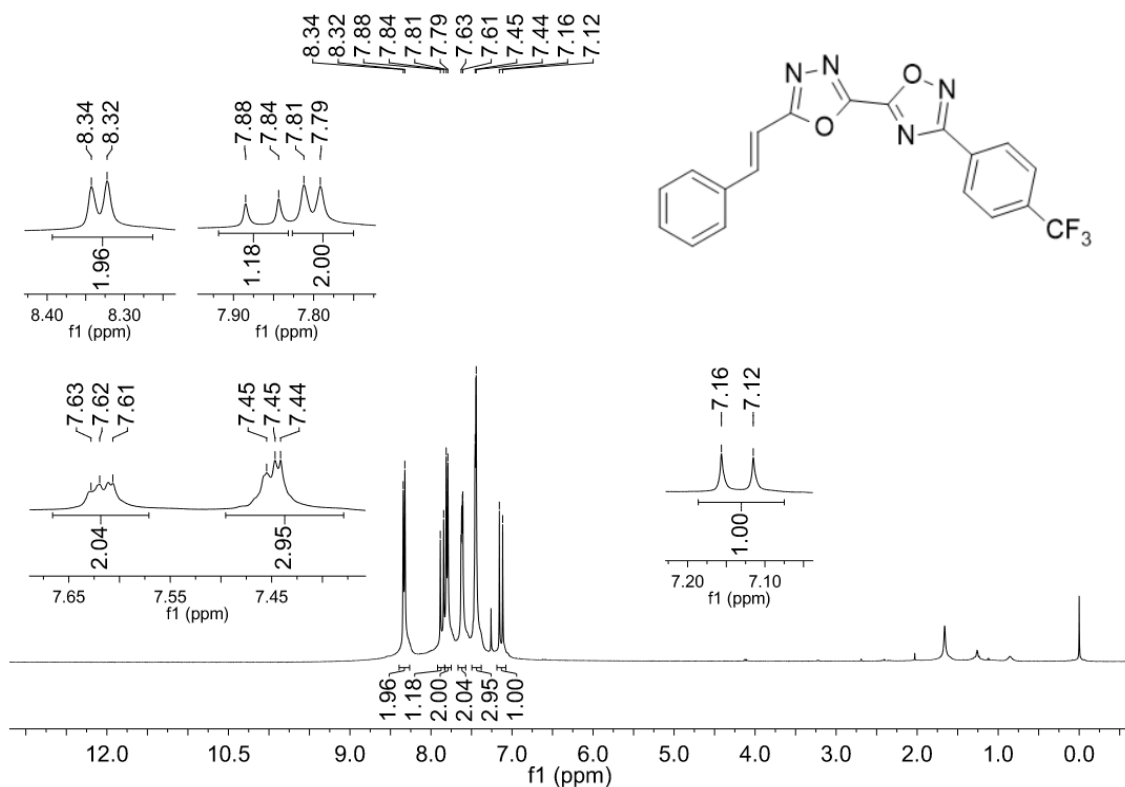

**Figure S9.** <sup>1</sup>H NMR spectrum (CDCl<sub>3</sub> at 400 MHz) of compound **7ae**.

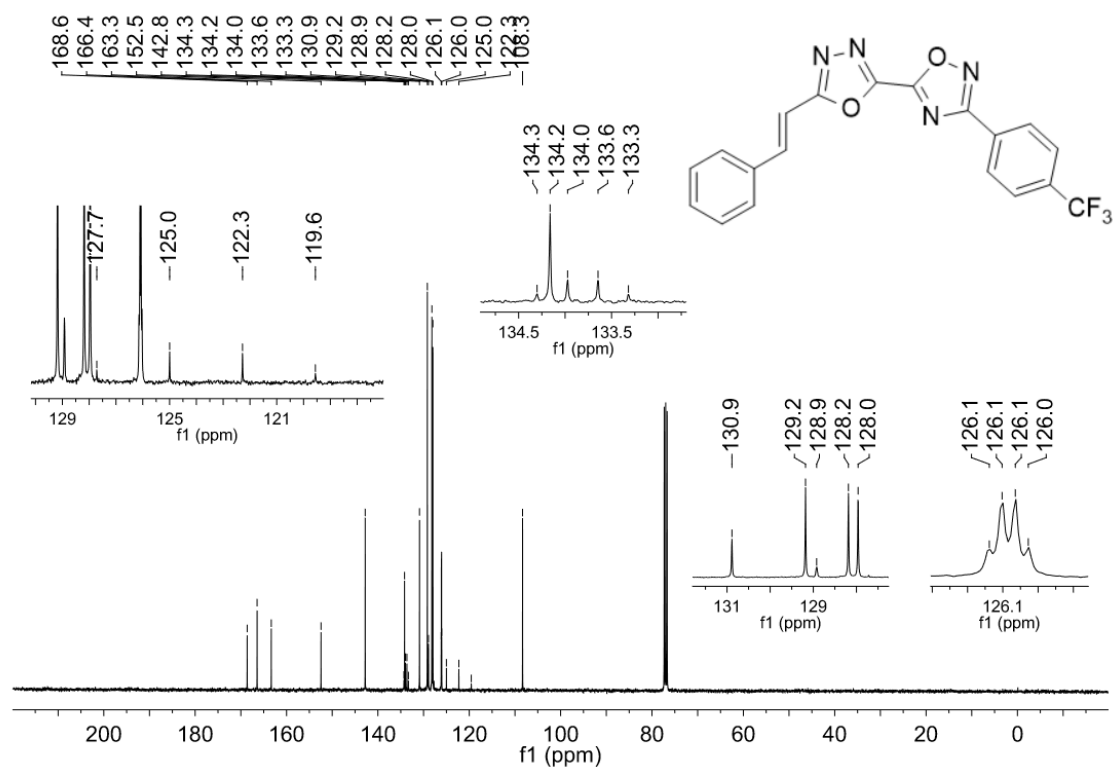

**Figure S10.** <sup>13</sup>C NMR spectrum (CDCl<sub>3</sub> at 100 MHz) of compound **7ae**.

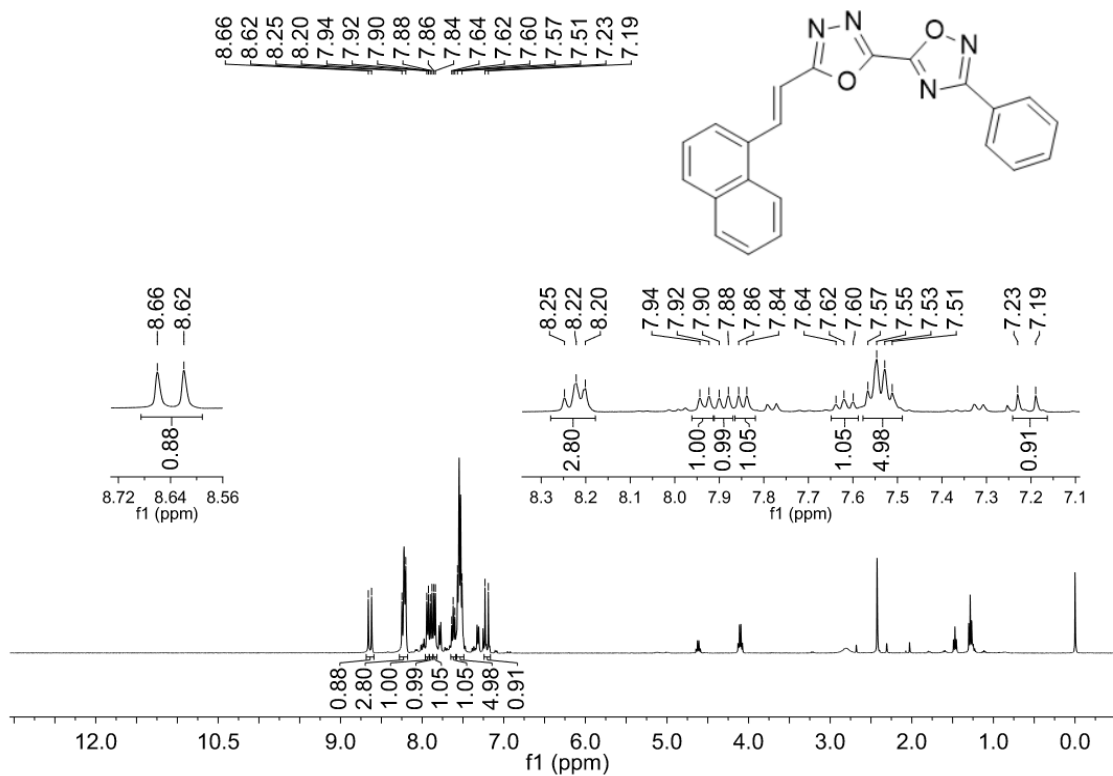

**Figure S11.** <sup>1</sup>H NMR spectrum (CDCl<sub>3</sub> at 400 MHz) of compound **7ba**.

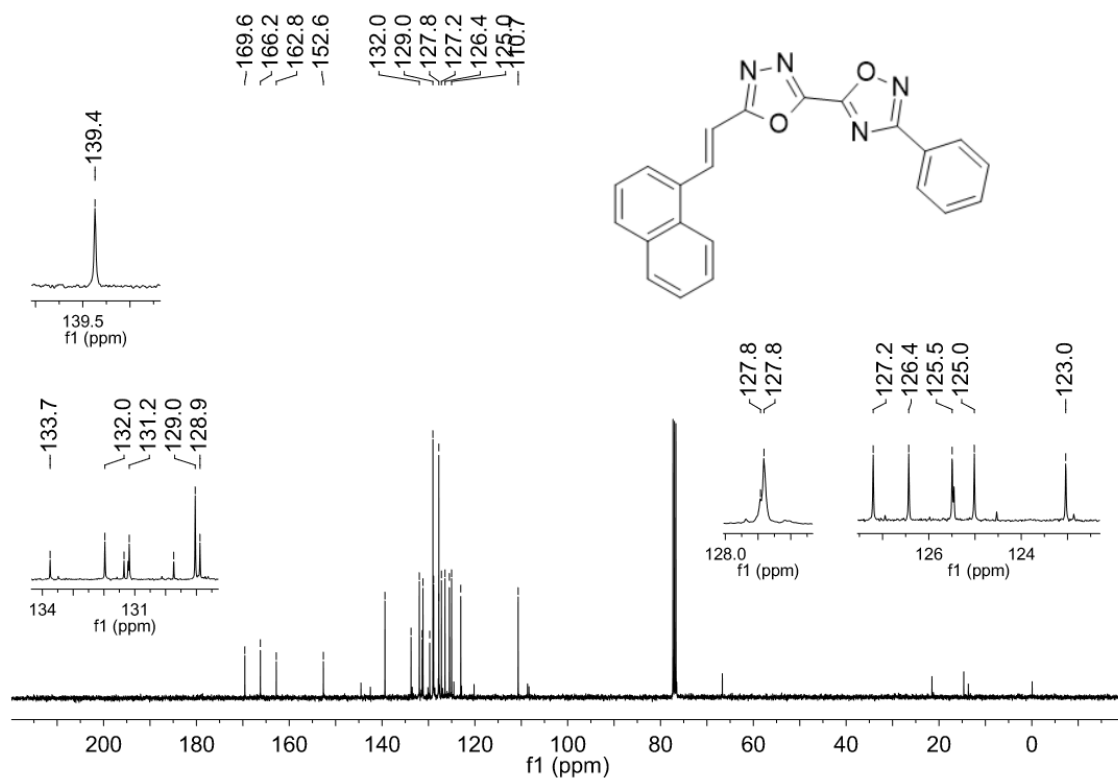

**Figure S12.** <sup>13</sup>C NMR spectrum (CDCl<sub>3</sub> at 100 MHz) of compound **7ba**.

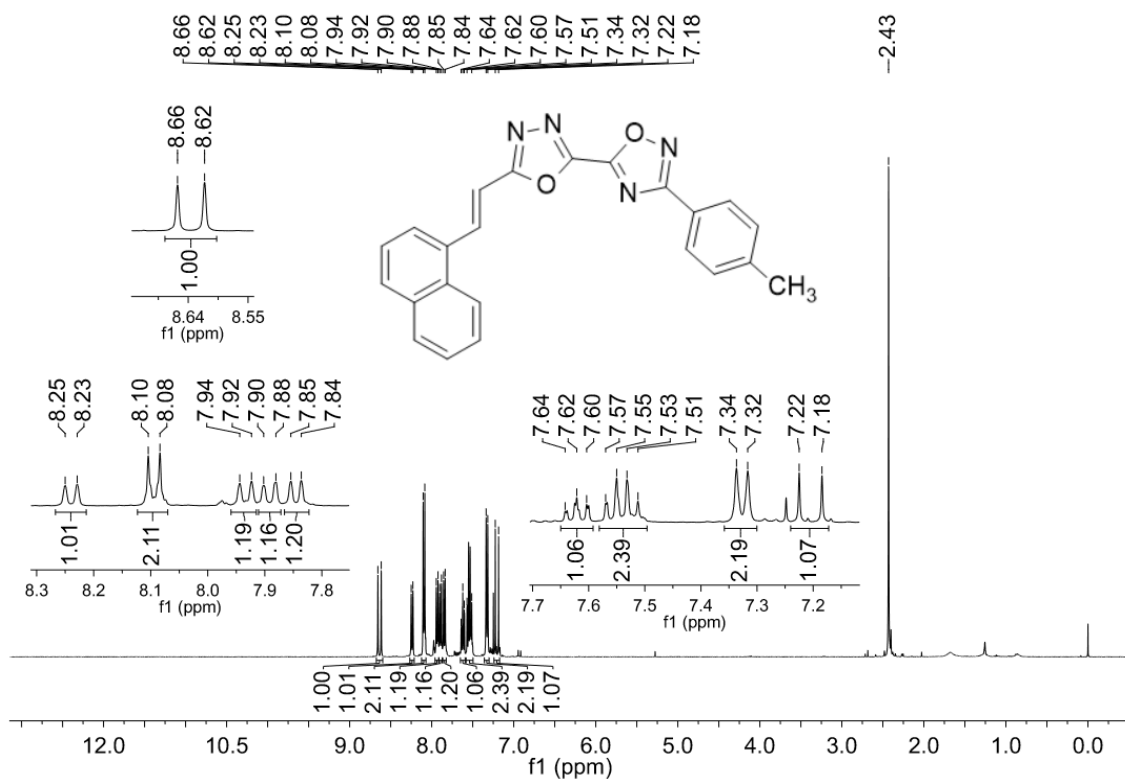

**Figure S13.** <sup>1</sup>H NMR spectrum (CDCl<sub>3</sub> at 400 MHz) of compound **7bb**.

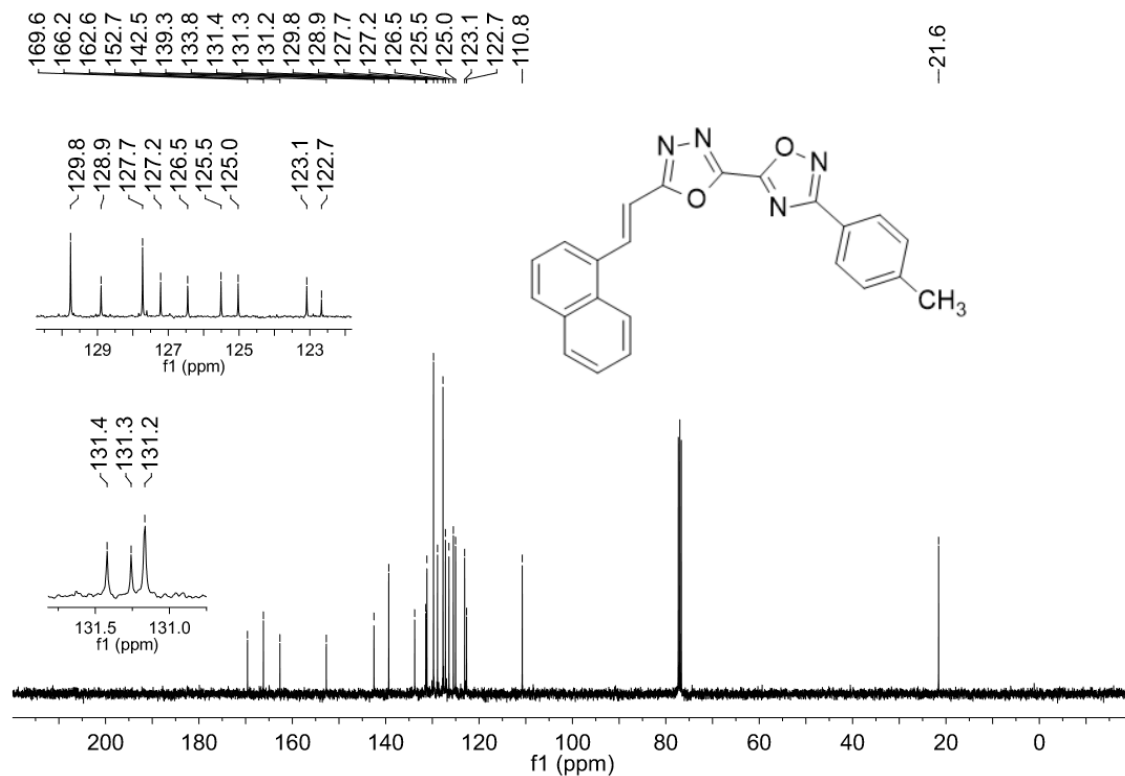

**Figure S14.** <sup>13</sup>C NMR spectrum (CDCl<sub>3</sub> at 100 MHz) of compound **7bb**.



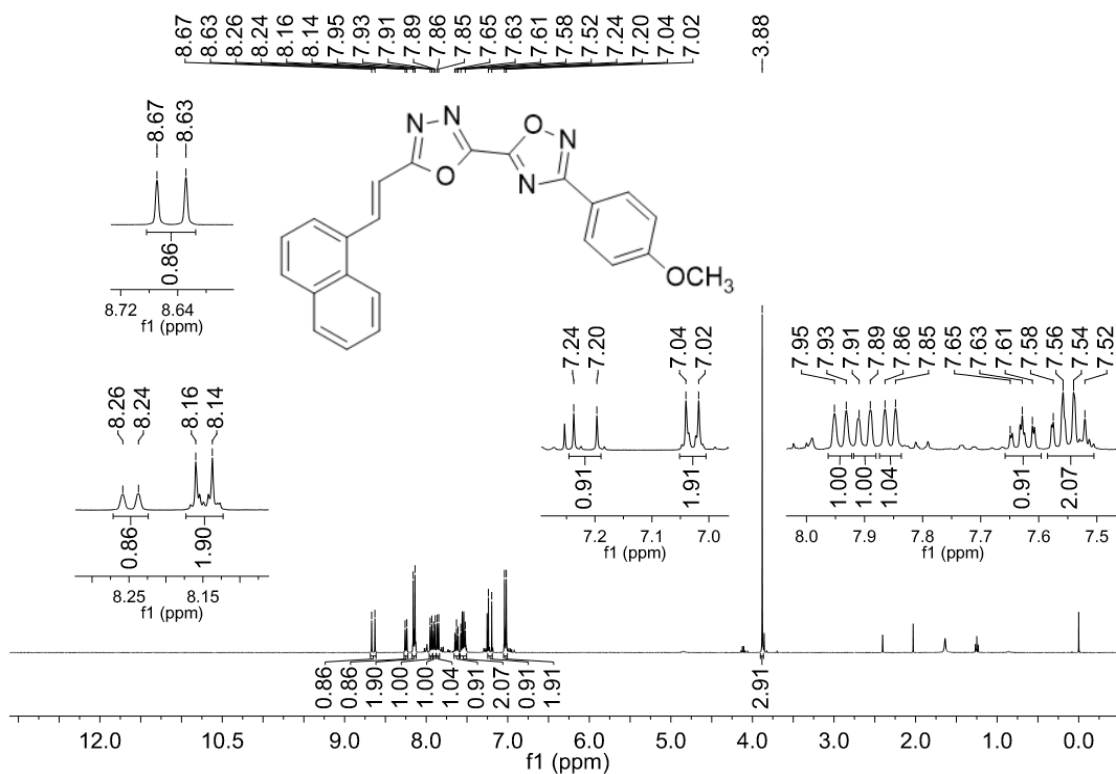

**Figure S15.** <sup>1</sup>H NMR spectrum (CDCl<sub>3</sub> at 400 MHz) of compound **7bc**.

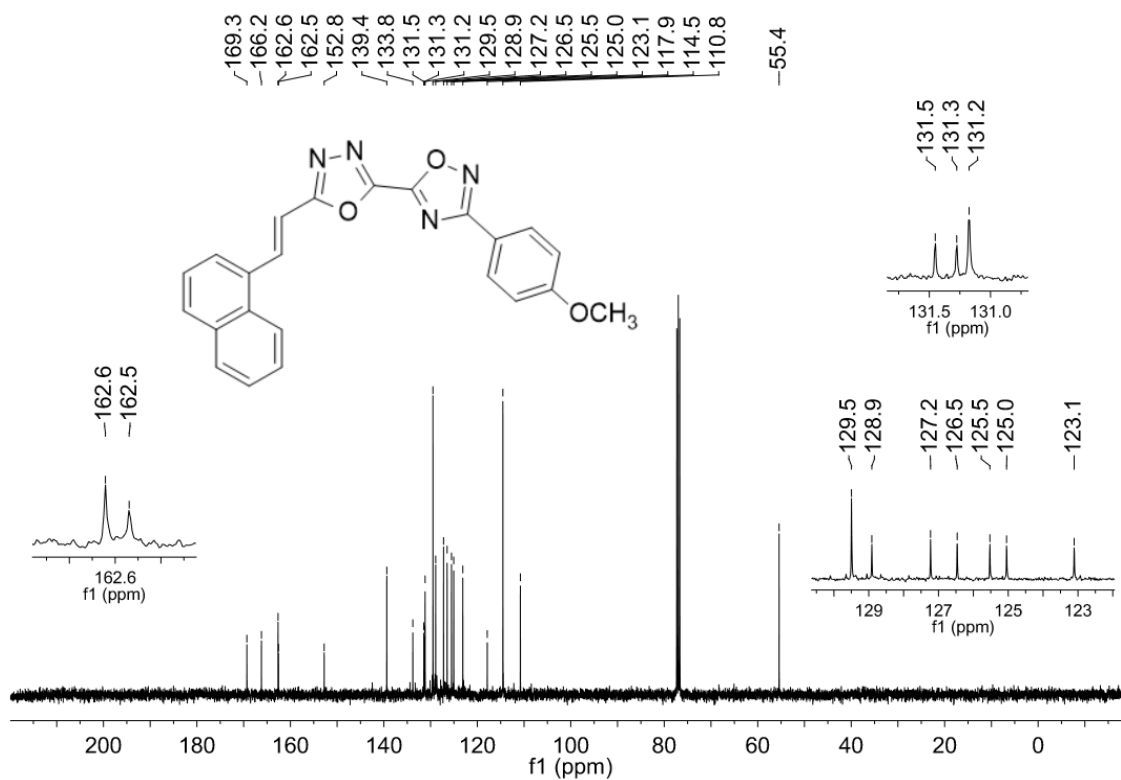

**Figure S16.** <sup>13</sup>C NMR spectrum (CDCl<sub>3</sub> at 100 MHz) of compound **7bc**.

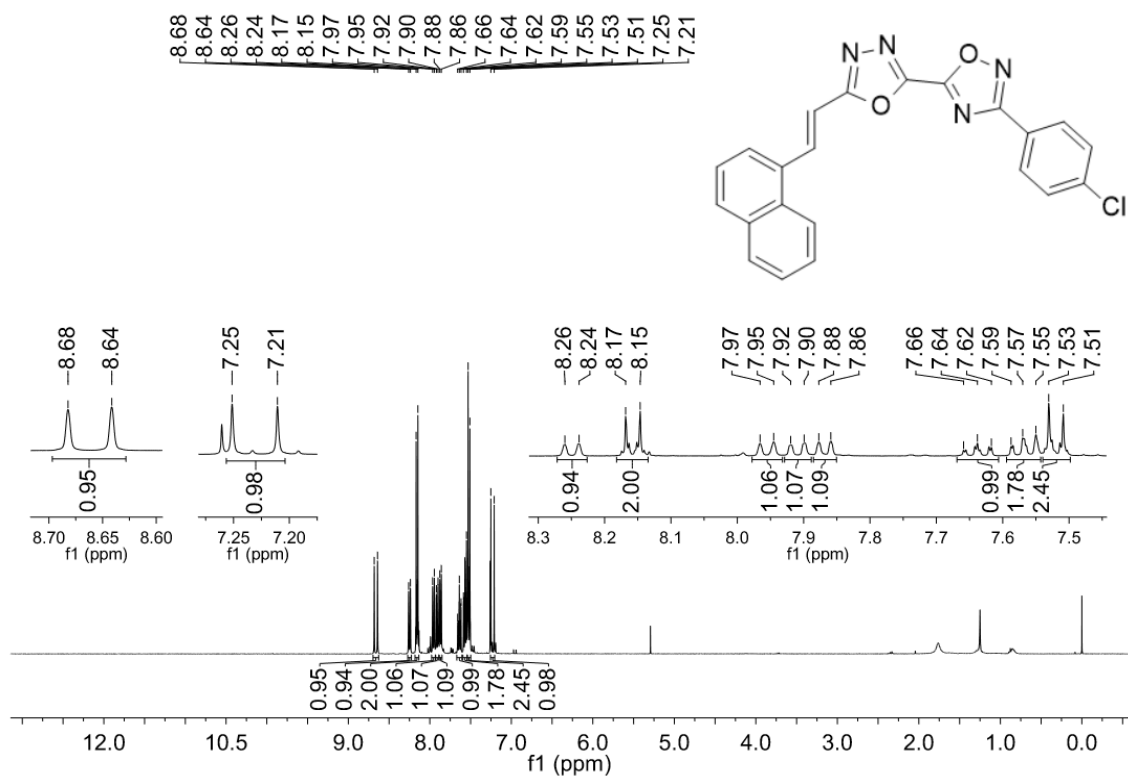

**Figure S17.** <sup>1</sup>H NMR spectrum (CDCl<sub>3</sub> at 400 MHz) of compound **7bd**.

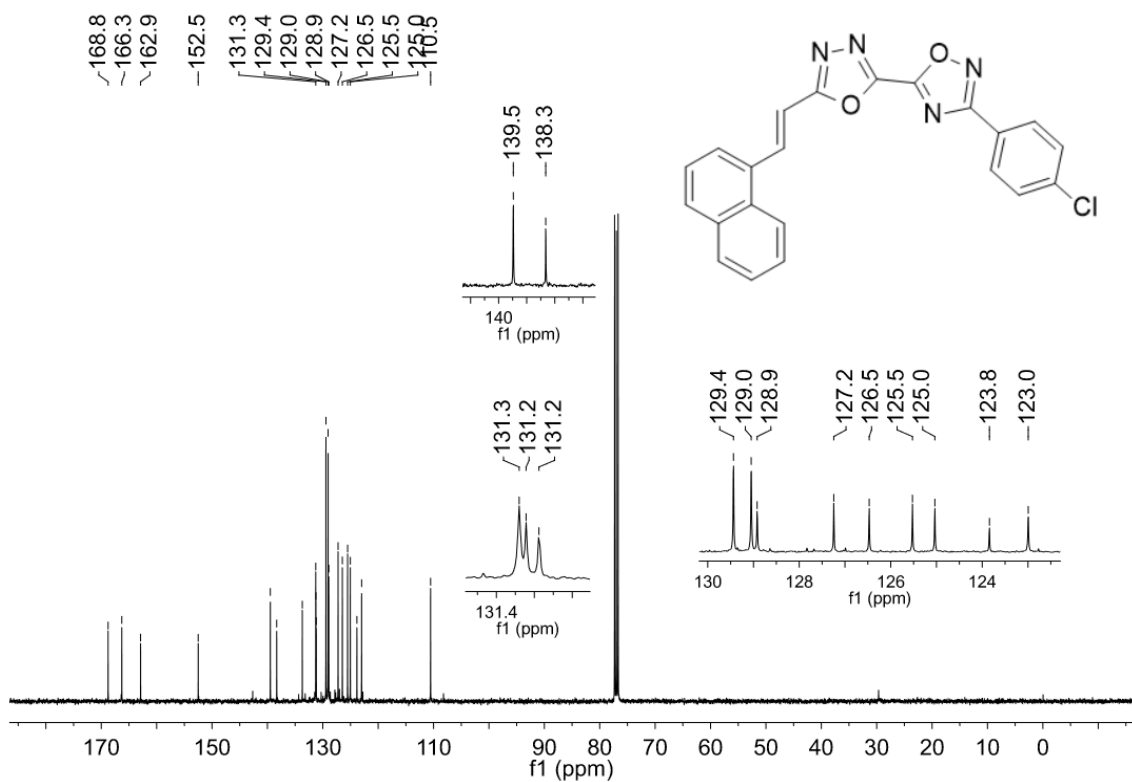

**Figure S18.** <sup>13</sup>C NMR spectrum (CDCl<sub>3</sub> at 100 MHz) of compound **7bd**.

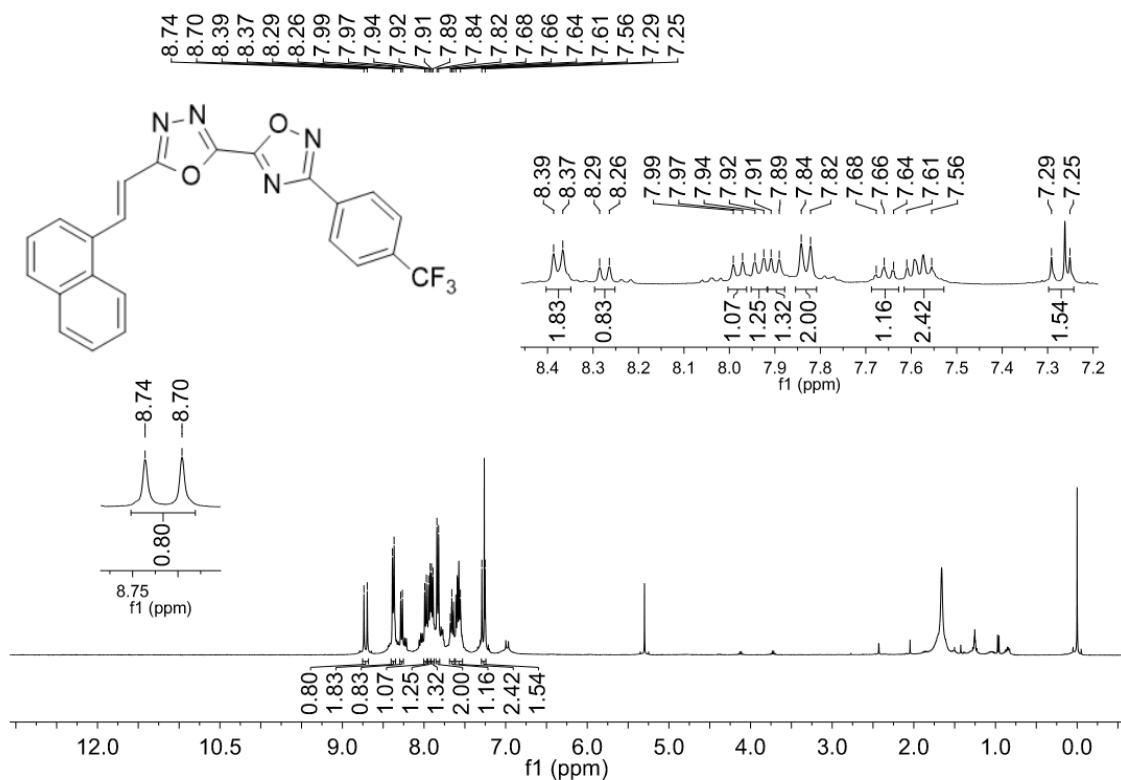

**Figure S19.**  $^1\text{H}$  NMR spectrum (CDCl<sub>3</sub> at 400 MHz) of compound **7be**.

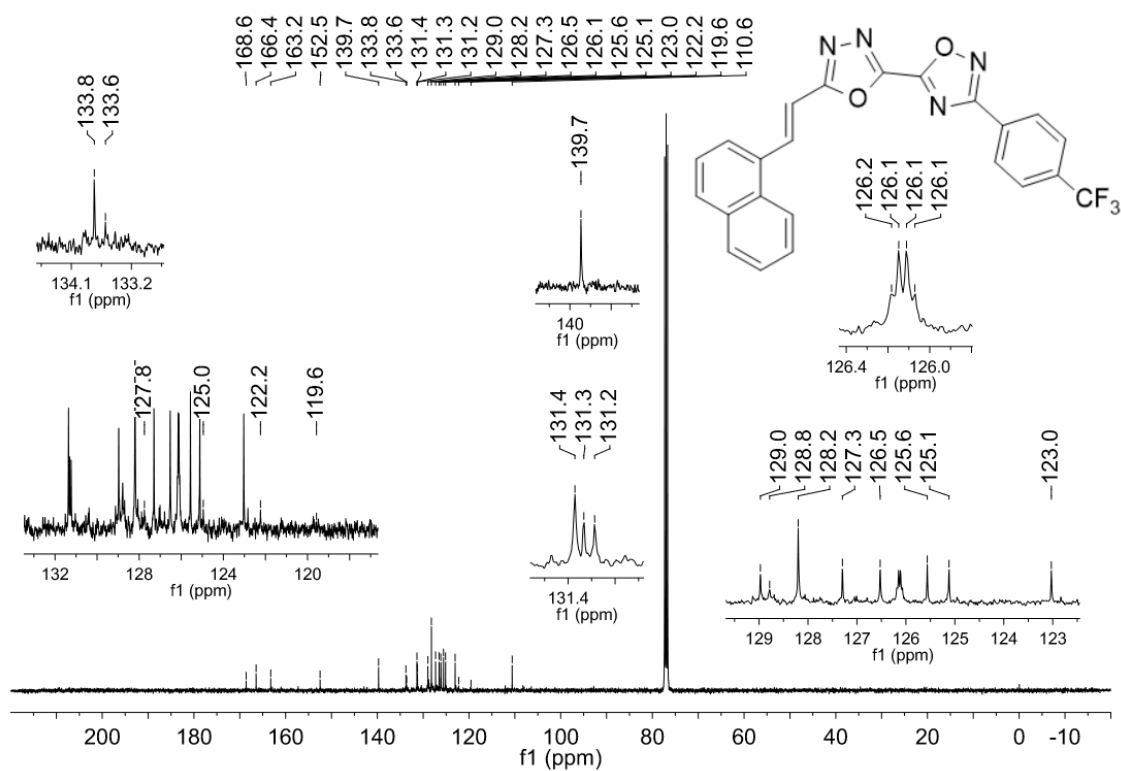

**Figure S20.**  $^{13}\text{C}$  NMR spectrum (CDCl<sub>3</sub> at 100 MHz) of compound **7be**.

## HRMS Spectra of compounds 7aa-be

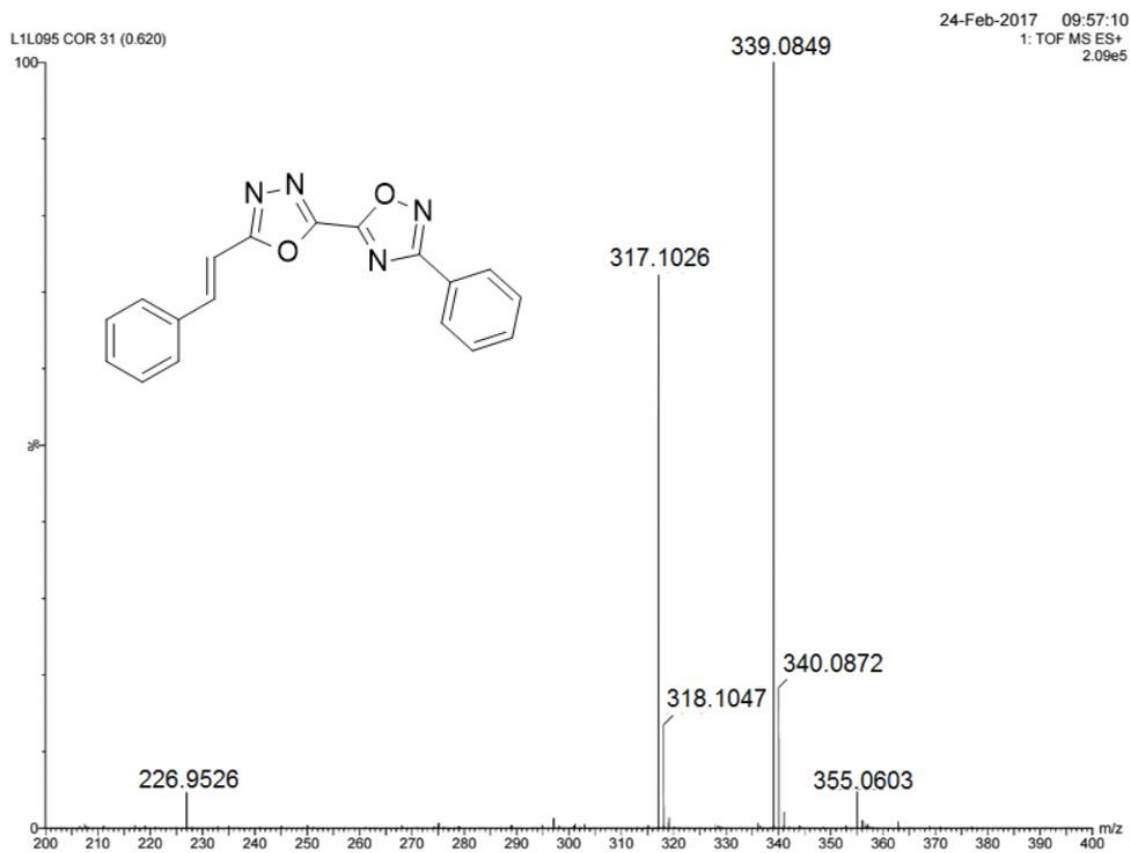

**Figure S21.** HRMS Spectrum of compound **7aa** (ESI+).

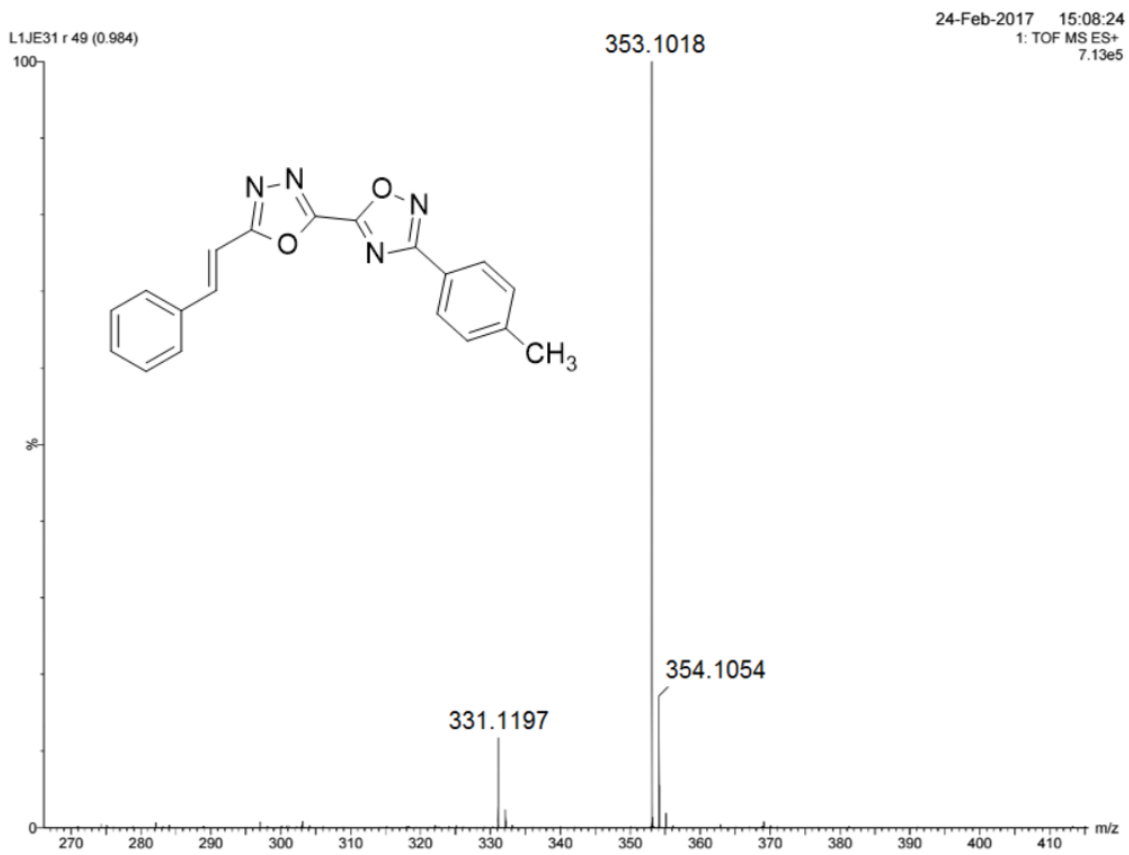

**Figure S22.** HRMS Spectrum of compound **7ab** (ESI+).

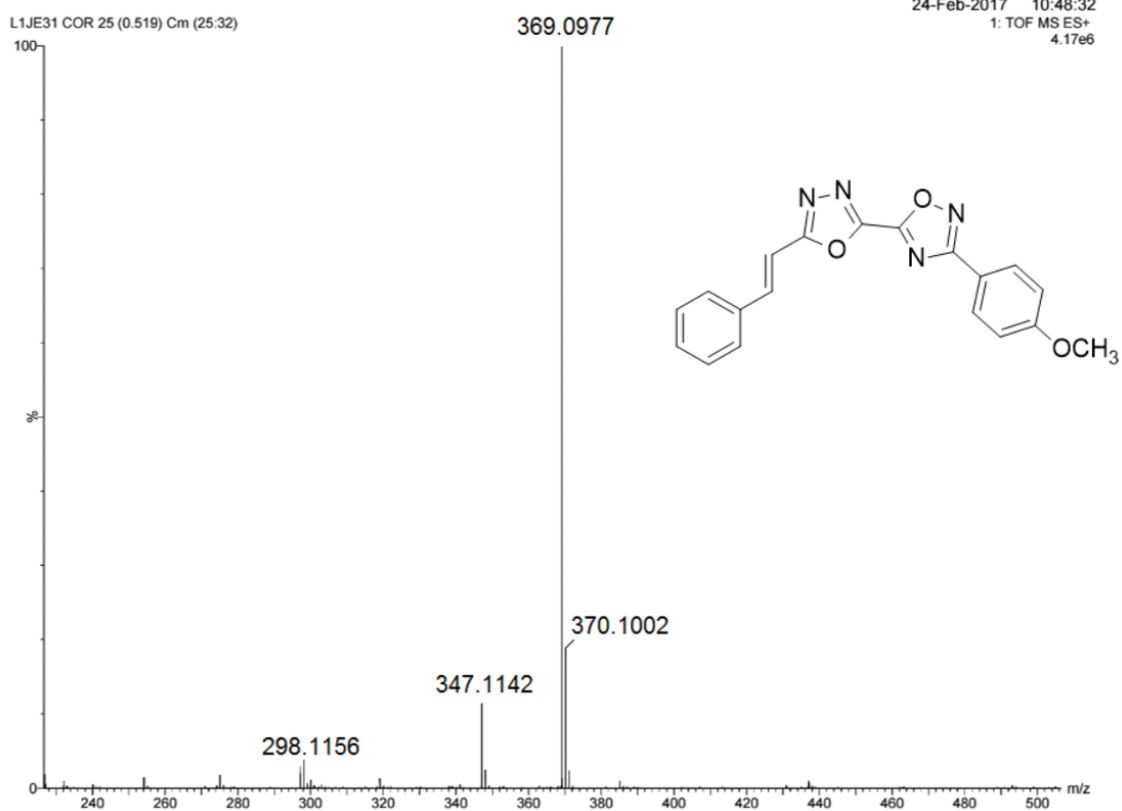

**Figure S23.** HRMS Spectrum of compound **7ac** (ESI+).

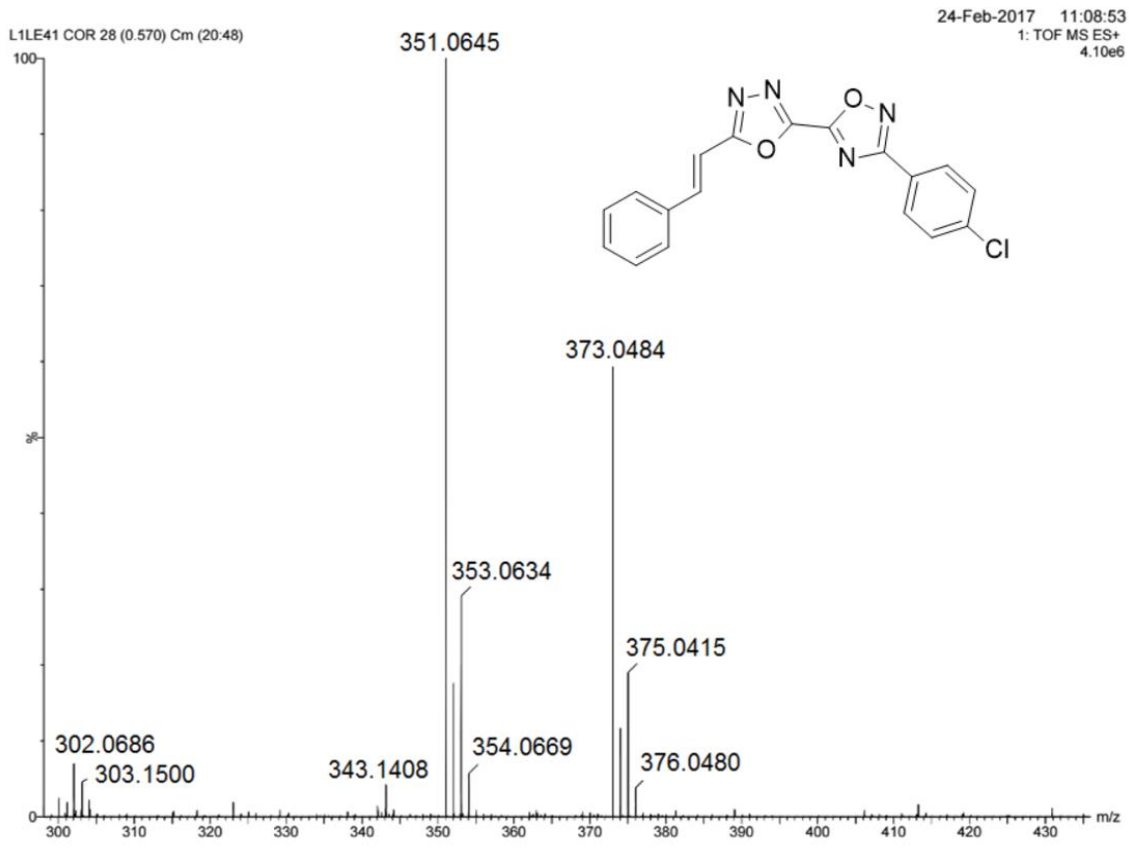

**Figure S24.** HRMS Spectrum of compound **7ad** (ESI+).

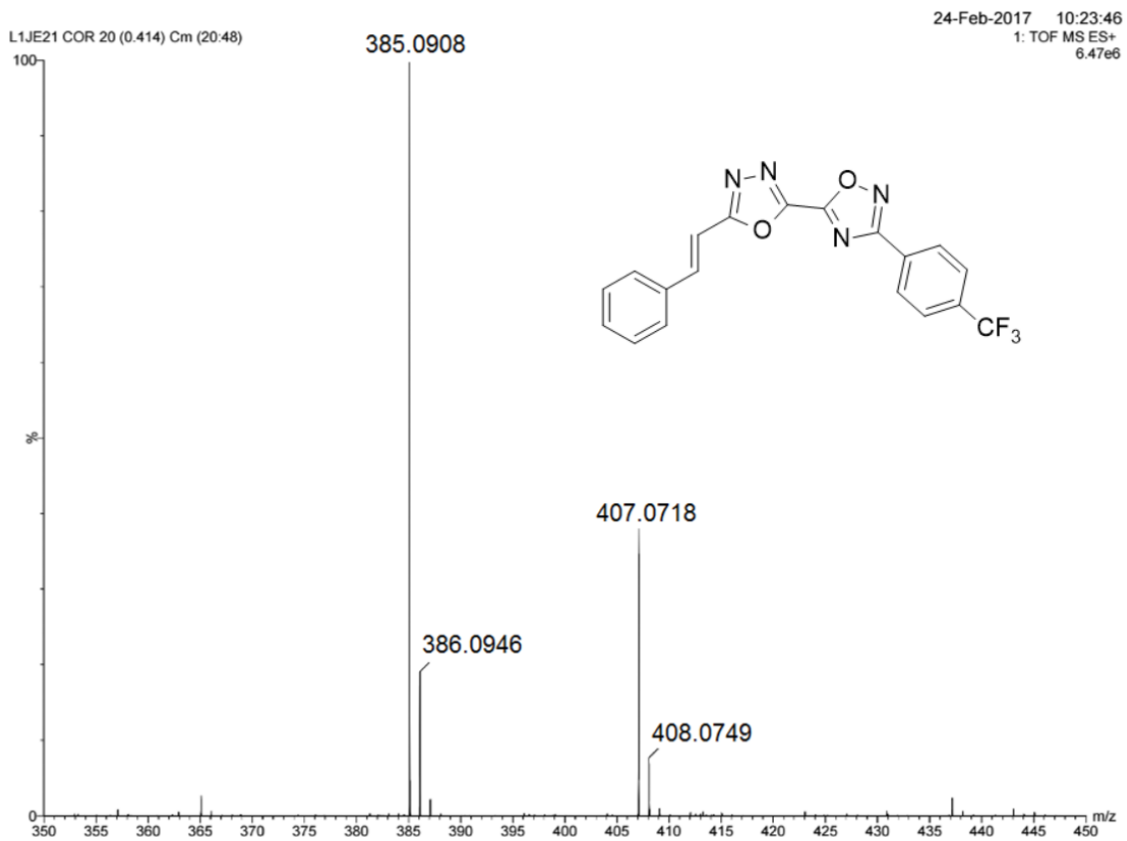

**Figure S25.** HRMS Spectrum of compound **7ae** (ESI+).



Waters  
L1JE14 117 (1.995)

24-Feb-2017 11:39:39  
TOF MS ES+  
4.53e5

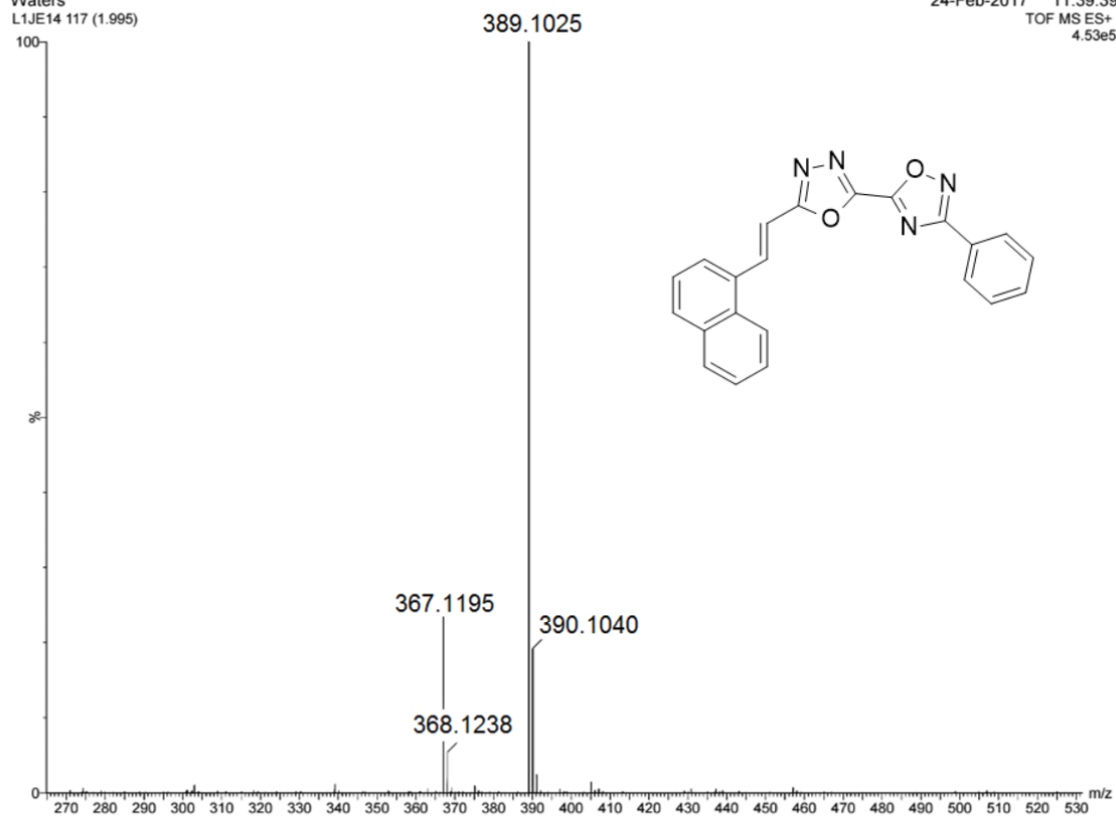

**Figure S26.** HRMS Spectrum of compound **7ba** (ESI+).

Waters  
L1JE34 2402 5 (0.101) Cm (1.94)

24-Feb-2017 12:20:55  
TOF MS ES+  
5.20e7

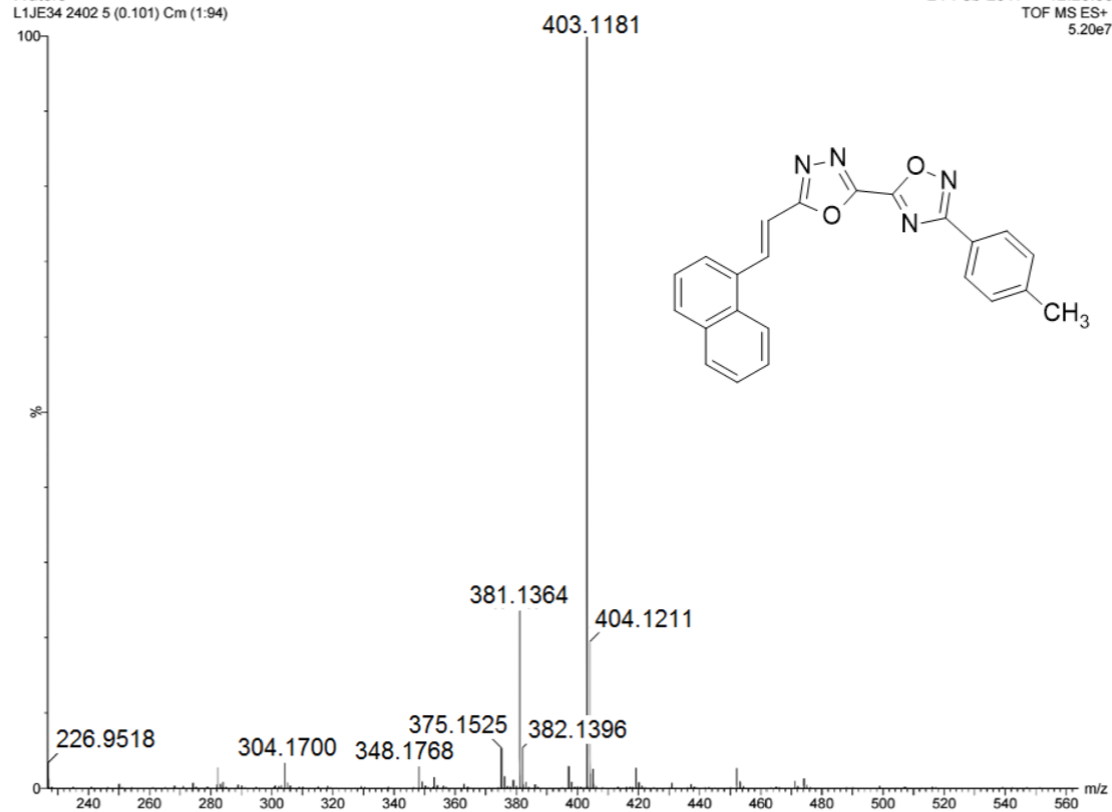

**Figure S27.** HRMS Spectrum of compound **7bb** (ESI+).

Waters  
L1AE44 67 (1.150) Cm (2-114)

24-Feb-2017 12:47:40  
TOF MS ES+  
4.31e7

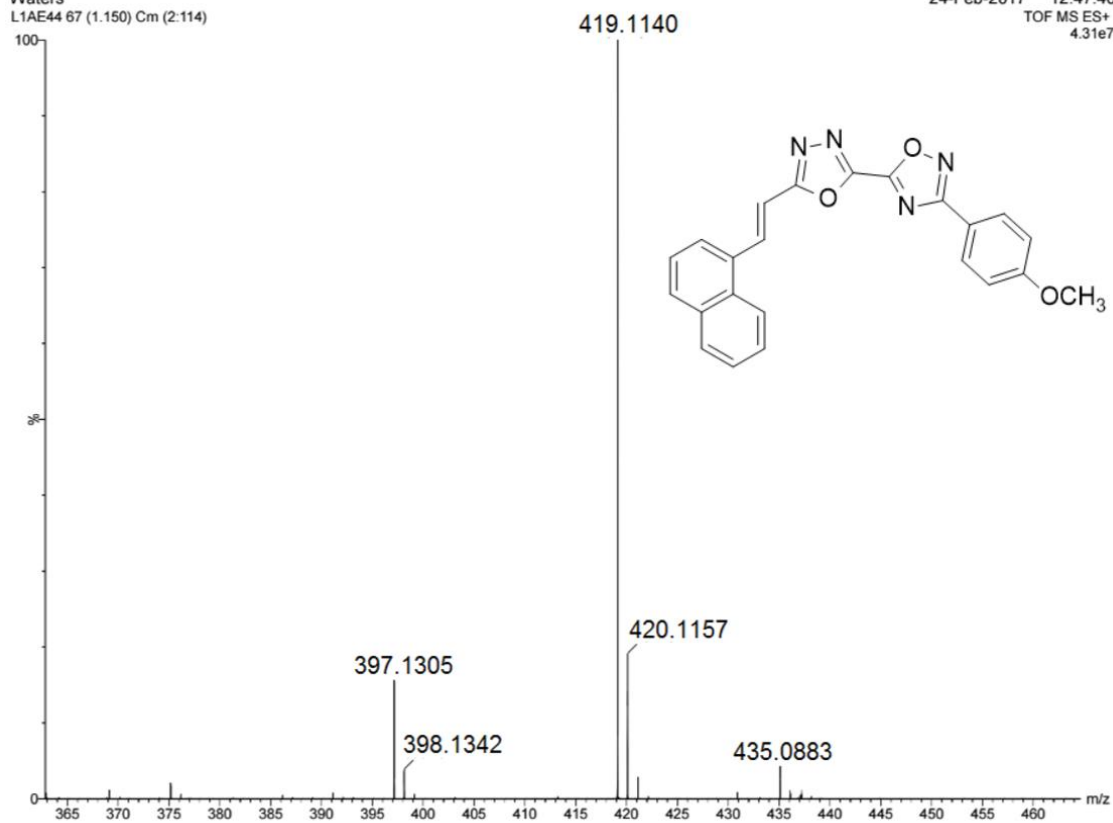

**Figure S28.** HRMS Spectrum of compound **7bc** (ESI+).

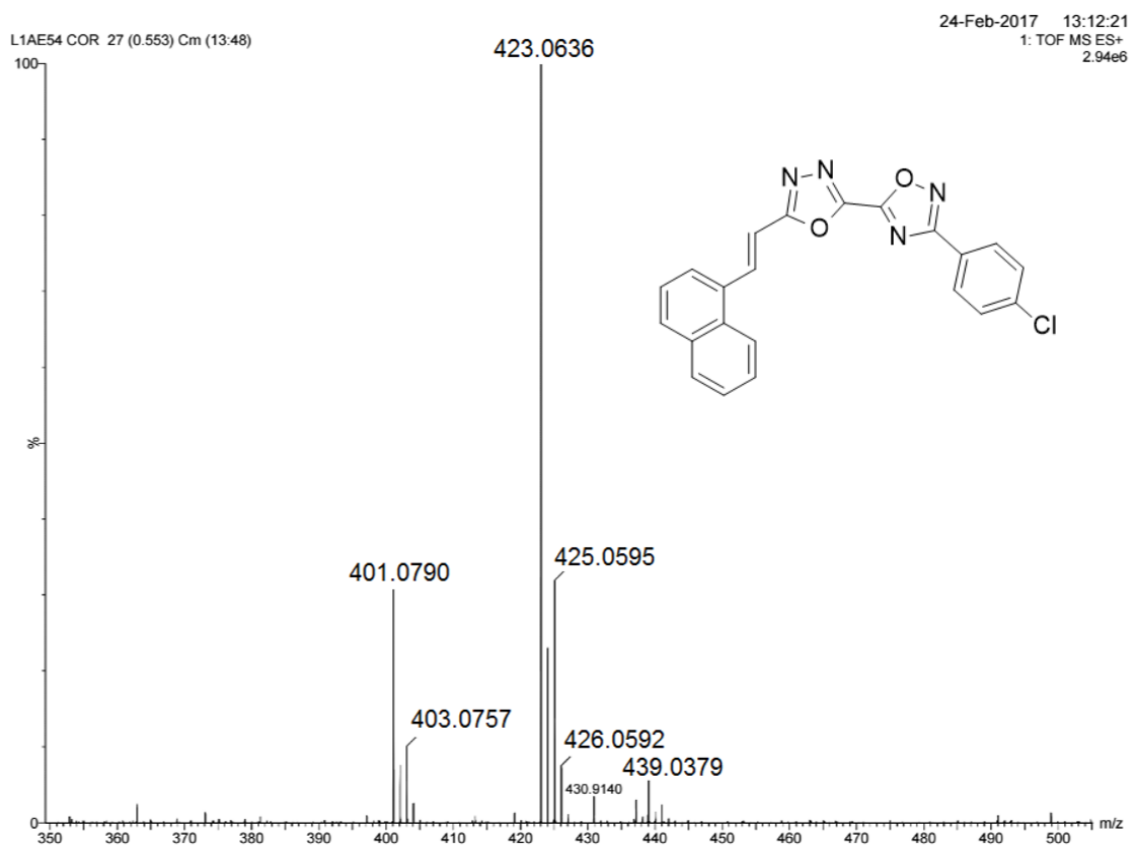

**Figure S29.** HRMS Spectrum of compound **7bd** (ESI+).

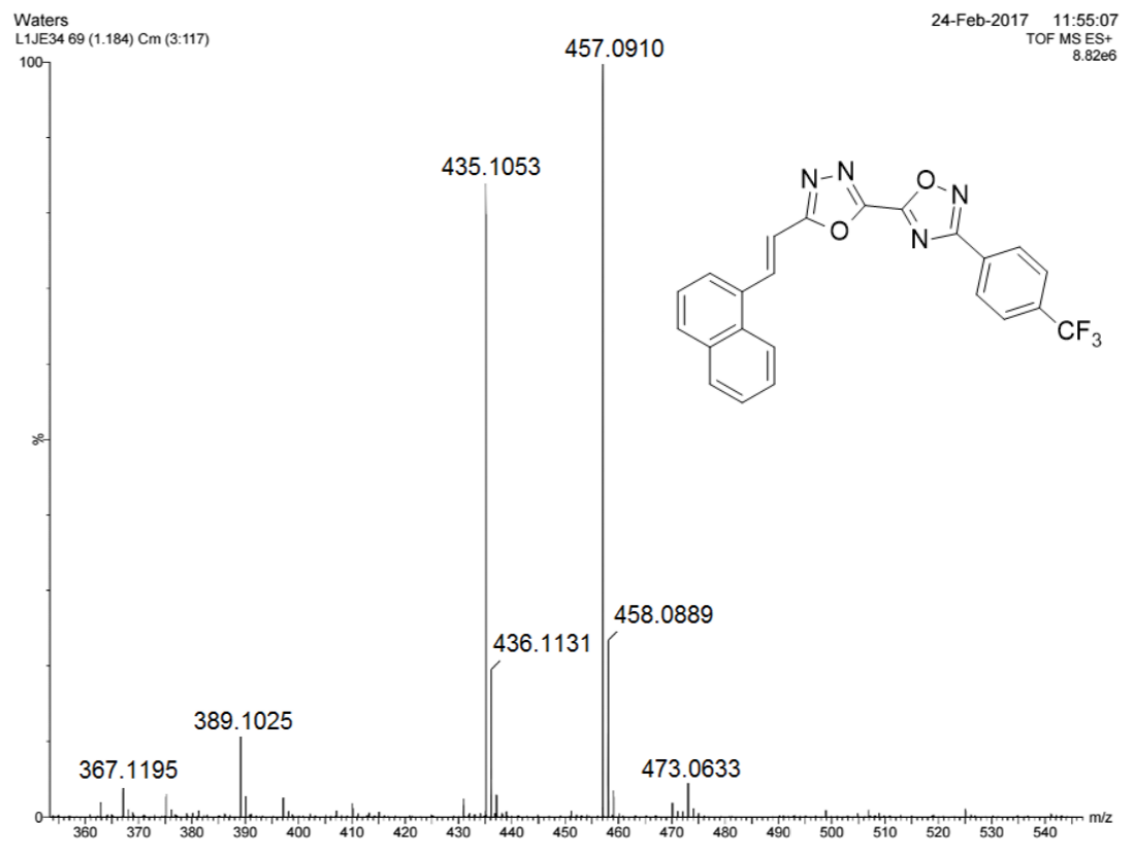

**Figure S30.** HRMS Spectrum of compound **7be** (ESI+).

**Table S1.** Crystal data and details of the refinement of the crystal structure of **7aa**.

| Compound                                                                                      | <b>7aa</b>                                                    |
|-----------------------------------------------------------------------------------------------|---------------------------------------------------------------|
| Empirical formula                                                                             | C <sub>18</sub> H <sub>12</sub> N <sub>4</sub> O <sub>2</sub> |
| Formula weight                                                                                | 316.32                                                        |
| Temperature (K)                                                                               | 100(2)                                                        |
| Wavelength                                                                                    | 0.71073                                                       |
| Crystal system                                                                                | Monoclinic                                                    |
| Space group                                                                                   | <i>P</i> 2 <sub>1</sub> / <i>c</i>                            |
| <i>a</i> (Å)                                                                                  | 15.8581(13)                                                   |
| <i>b</i> (Å)                                                                                  | 4.2689(3)                                                     |
| <i>c</i> (Å)                                                                                  | 22.0230(18)                                                   |
| $\alpha$ (°)                                                                                  | 90                                                            |
| $\beta$ (°)                                                                                   | 94.541(3)                                                     |
| $\gamma$ (°)                                                                                  | 90                                                            |
| Volume (Å <sup>3</sup> )                                                                      | 1486.2(2)                                                     |
| <i>Z</i>                                                                                      | 4                                                             |
| Calculated density(mg·m <sup>-3</sup> )                                                       | 1.414                                                         |
| Absorp. coefficient (mm <sup>-1</sup> )                                                       | 0.096                                                         |
| <i>F</i> (000)                                                                                | 656                                                           |
| Crystal size (mm)                                                                             | 0.373 x 0.104 x 0.080                                         |
| Theta range for data collection (°)                                                           | 2.34 to 27.13                                                 |
| Limiting indices                                                                              | -20 ≤ <i>h</i> ≤ 20. -5 ≤ <i>k</i> ≤ 5. -28 ≤ <i>l</i> ≤ 28   |
| Reflections collected / unique                                                                | 12694 / 3290                                                  |
| Completeness to theta                                                                         | 99.8%                                                         |
| Absorption correction                                                                         | Semi-empirical from equivalents                               |
| Max. and min. trans.                                                                          | 0.8620/0.6741                                                 |
| Data / restraints / parameters                                                                | 3290 / 0 / 217                                                |
| Goodness-of-fit on <i>F</i> <sup>2</sup>                                                      | 1.015                                                         |
| Índice <i>R</i> <sub>int</sub>                                                                | 0.0768                                                        |
| Final R indices <i>R</i> <sub>1</sub> and <i>wR</i> <sub>2</sub> [ <i>I</i> > 2σ( <i>I</i> )] | 0.0572 / 0.01129                                              |
| <i>R</i> indices (all data)                                                                   | 0.01129 / 0.01344                                             |
| Largest diff. peak and hole                                                                   | 0.243 and -0.333 e·Å <sup>-3</sup>                            |

**Table S2.** Bond lengths [Å] and angles [deg] for **7aa**.

|                   |            |
|-------------------|------------|
| O(12)-C(13)       | 1.364(2)   |
| O(12)-C(16)       | 1.374(2)   |
| O(1)-C(5)         | 1.346(2)   |
| O(1)-N(2)         | 1.413(2)   |
| N(15)-C(16)       | 1.302(3)   |
| N(15)-N(14)       | 1.402(2)   |
| N(14)-C(13)       | 1.286(3)   |
| N(2)-C(3)         | 1.310(3)   |
| N(4)-C(5)         | 1.290(3)   |
| N(4)-C(3)         | 1.392(2)   |
| C(13)-C(5)        | 1.444(3)   |
| C(6)-C(11)        | 1.384(3)   |
| C(6)-C(7)         | 1.402(3)   |
| C(6)-C(3)         | 1.460(3)   |
| C(19)-C(20)       | 1.388(3)   |
| C(19)-C(24)       | 1.397(3)   |
| C(19)-C(18)       | 1.472(3)   |
| C(17)-C(18)       | 1.339(3)   |
| C(17)-C(16)       | 1.437(3)   |
| C(8)-C(9)         | 1.378(3)   |
| C(8)-C(7)         | 1.382(3)   |
| C(10)-C(11)       | 1.384(3)   |
| C(10)-C(9)        | 1.392(3)   |
| C(20)-C(21)       | 1.389(3)   |
| C(21)-C(22)       | 1.375(4)   |
| C(22)-C(23)       | 1.382(4)   |
| C(24)-C(23)       | 1.382(3)   |
| C(13)-O(12)-C(16) | 101.45(16) |
| C(5)-O(1)-N(2)    | 104.81(16) |
| C(16)-N(15)-N(14) | 106.42(18) |
| C(13)-N(14)-N(15) | 105.77(17) |
| C(3)-N(2)-O(1)    | 104.41(16) |
| C(5)-N(4)-C(3)    | 101.83(17) |
| N(14)-C(13)-O(12) | 113.99(18) |
| N(14)-C(13)-C(5)  | 126.46(19) |
| O(12)-C(13)-C(5)  | 119.49(19) |
| C(11)-C(6)-C(7)   | 119.6(2)   |
| C(11)-C(6)-C(3)   | 121.18(18) |
| C(7)-C(6)-C(3)    | 119.2(2)   |
| C(20)-C(19)-C(24) | 118.7(2)   |
| C(20)-C(19)-C(18) | 118.7(2)   |
| C(24)-C(19)-C(18) | 122.6(2)   |
| N(4)-C(5)-O(1)    | 115.14(18) |
| N(4)-C(5)-C(13)   | 129.97(19) |
| O(1)-C(5)-C(13)   | 114.87(19) |
| C(18)-C(17)-C(16) | 124.0(2)   |

|                   |            |
|-------------------|------------|
| C(17)-C(18)-C(19) | 125.4(2)   |
| N(2)-C(3)-N(4)    | 113.8(2)   |
| N(2)-C(3)-C(6)    | 121.88(18) |
| N(4)-C(3)-C(6)    | 124.29(19) |
| N(15)-C(16)-O(12) | 112.36(17) |
| N(15)-C(16)-C(17) | 126.9(2)   |
| O(12)-C(16)-C(17) | 120.75(19) |
| C(9)-C(8)-C(7)    | 119.98(19) |
| C(8)-C(7)-C(6)    | 120.1(2)   |
| C(11)-C(10)-C(9)  | 120.0(2)   |
| C(19)-C(20)-C(21) | 121.1(2)   |
| C(8)-C(9)-C(10)   | 120.3(2)   |
| C(10)-C(11)-C(6)  | 120.09(18) |
| C(22)-C(21)-C(20) | 119.6(2)   |
| C(21)-C(22)-C(23) | 120.1(2)   |
| C(23)-C(24)-C(19) | 120.0(2)   |
| C(22)-C(23)-C(24) | 120.6(2)   |

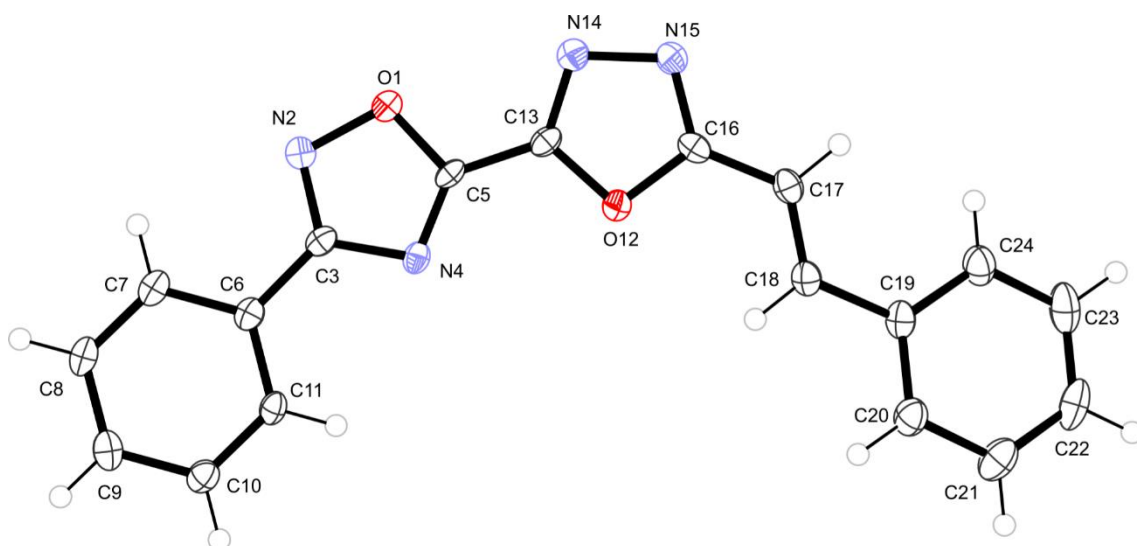

**Figure S31.** Projection of the molecular structure of the **7aa** ligand. Thermal ellipsoids with 50% probability level.



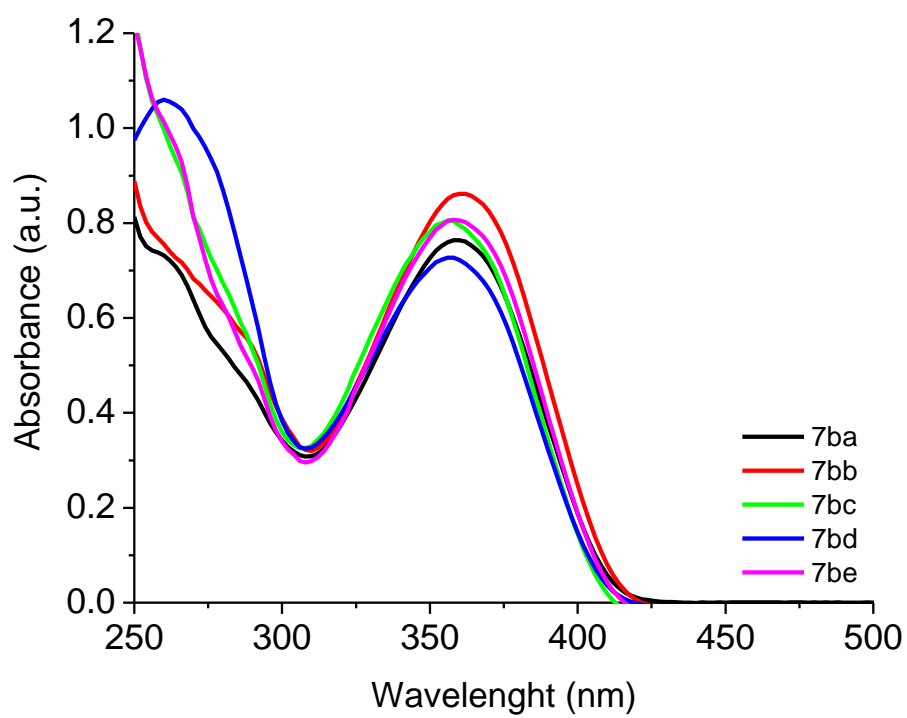

**Figure S32.** UV-Vis absorption spectra of derivatives **7ba-be** in  $\text{CHCl}_3$  solution ( $[\ ] = 2.00 \times 10^{-5} \text{ M}$ ).

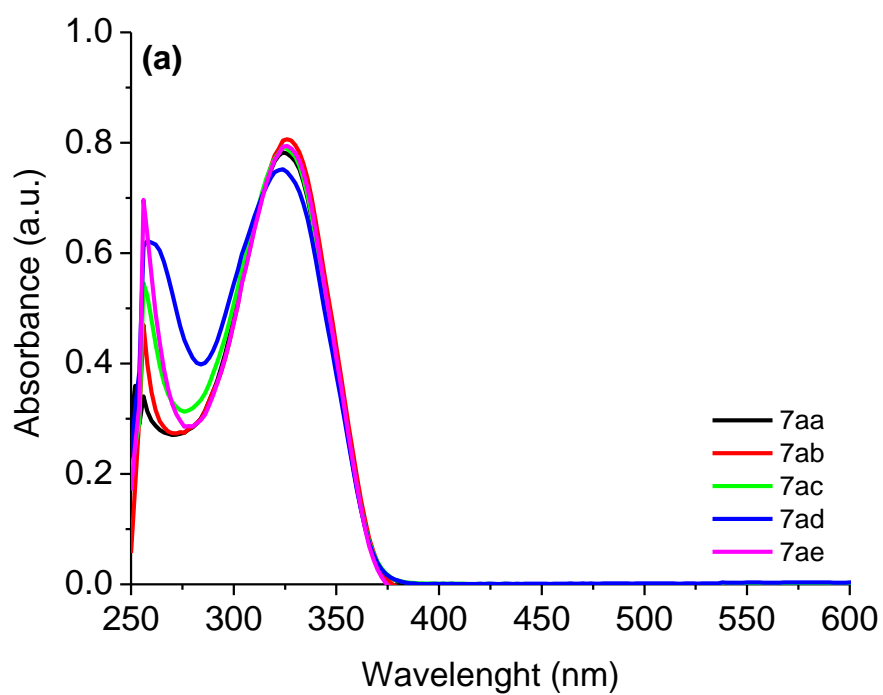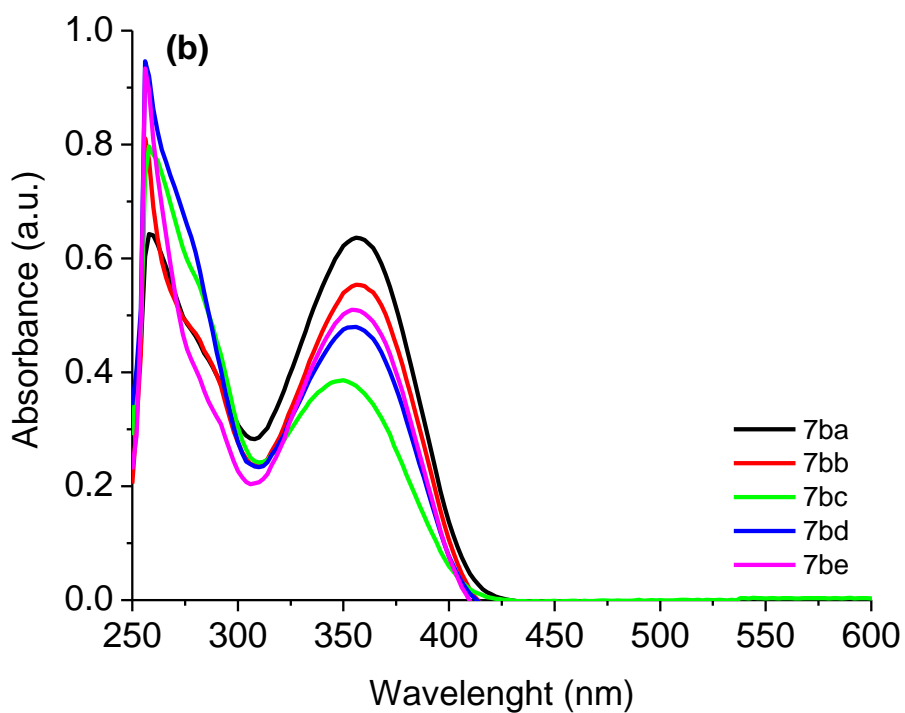

**Figure S33.** UV-Vis absorption spectra of derivatives (a) **7aa-ae** and (b) **7ba-be** in DMSO solution ( $[ ] = 2.00 \times 10^{-5} \text{ M}$ ).

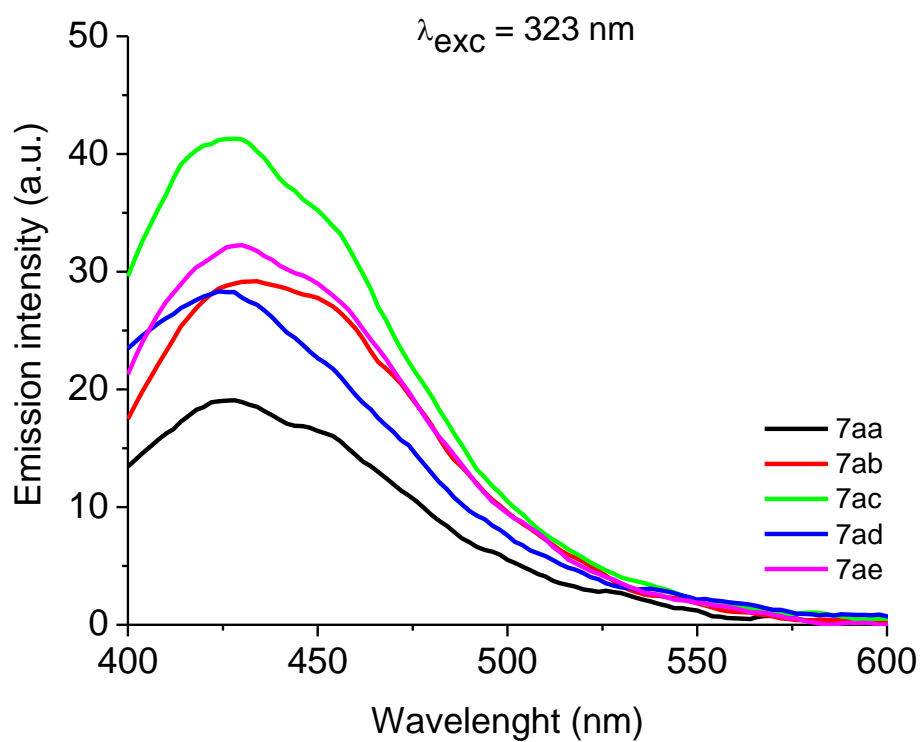

**Figure S34.** Steady-state emission spectra of derivatives **7aa-ae** ( $\lambda_{\text{exc}} = 323 \text{ nm}$ ) in saturated argon chloroform solution ( $[ ] = 1.00 \times 10^{-6} \text{ M}$ ).

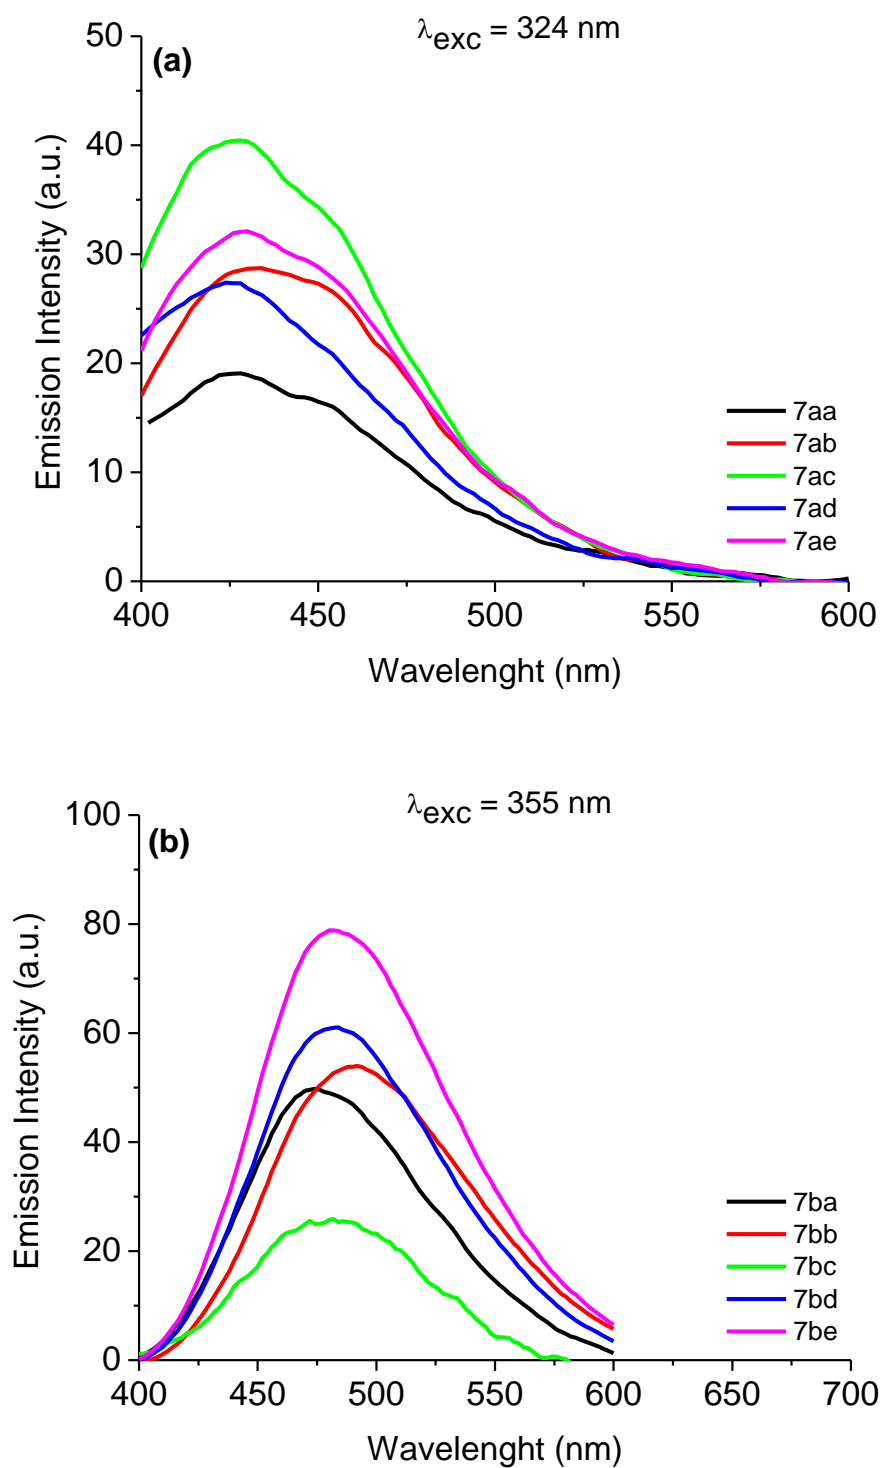

**Figure S35.** Steady-state emission spectra of derivatives **(a) 7aa-ae** ( $\lambda_{\text{exc}} = 324 \text{ nm}$ ) and **(b) 7ba-be** ( $\lambda_{\text{exc}} = 355 \text{ nm}$ ) in saturated argon DMSO solution ( $[ ] = 1.00 \times 10^{-6} \text{ M}$ ).

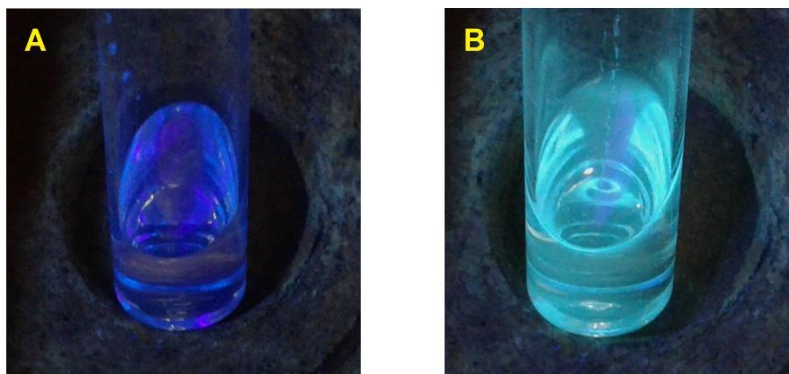

**Figure S36.** Representative samples of compound **7aa** at 1.0 mg/mL ( $1.05 \times 10^{-3}$  M) solution in DMSO (A), and compound **7ba** at 1.0 mg/mL ( $9.10 \times 10^{-4}$  M) solution in DMSO (B), both under UV illumination (365 nm).

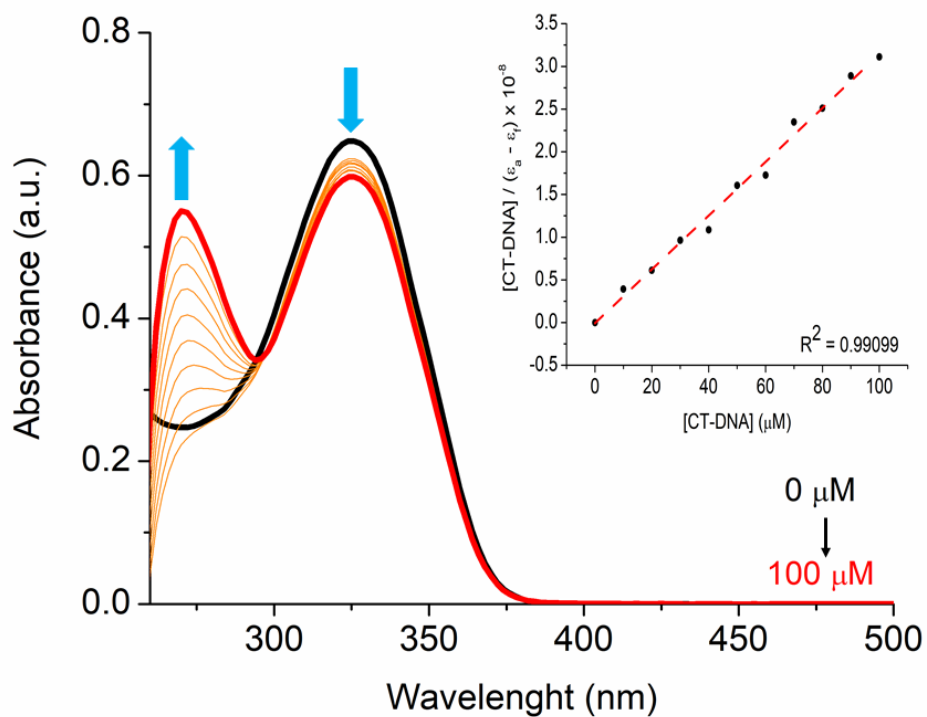

**Figure S37.** UV-Vis titration absorption spectra of derivative **7ab**, in a DMSO (2%)/Tris-HCl buffer (pH 7.2) solution. The concentration of CT-DNA ranged from 0 to 100  $\mu\text{M}$ . Insert graph shows the plot of  $[\text{DNA}] / (\epsilon_a - \epsilon_f)$  versus  $[\text{DNA}]$ .

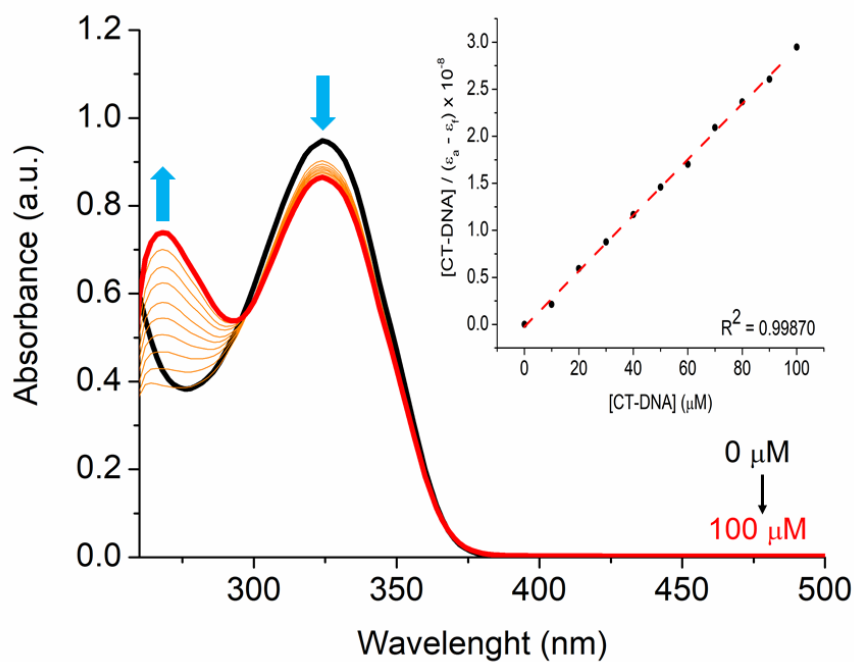

**Figure S38.** UV-Vis titration absorption spectra of derivative **7ac**, in a DMSO (2%)/Tris-HCl buffer (pH 7.2) solution. The concentration of CT-DNA ranged from 0 to 100  $\mu\text{M}$ . Insert graph shows the plot of  $[\text{DNA}]/(\epsilon_a - \epsilon_f)$  versus  $[\text{DNA}]$ .

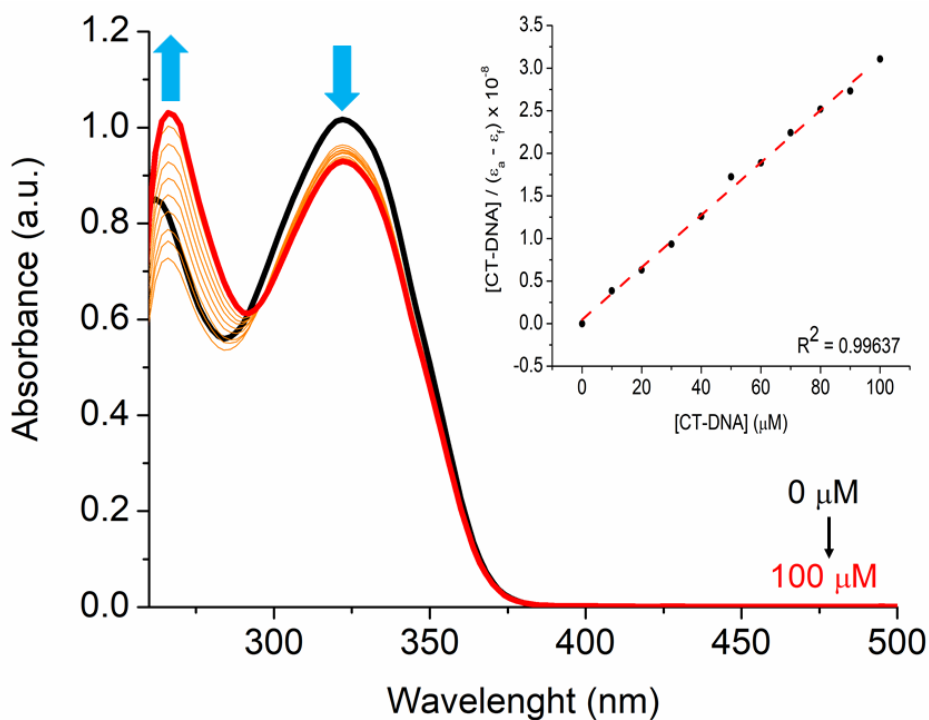

**Figure S39.** UV-Vis titration absorption spectra of derivative **7ad**, in a DMSO (2%)/Tris-HCl buffer (pH 7.2) solution. The concentration of CT-DNA ranged from 0 to 100  $\mu\text{M}$ . Insert graph shows the plot of  $[\text{DNA}]/(\epsilon_a - \epsilon_f)$  versus  $[\text{DNA}]$ .

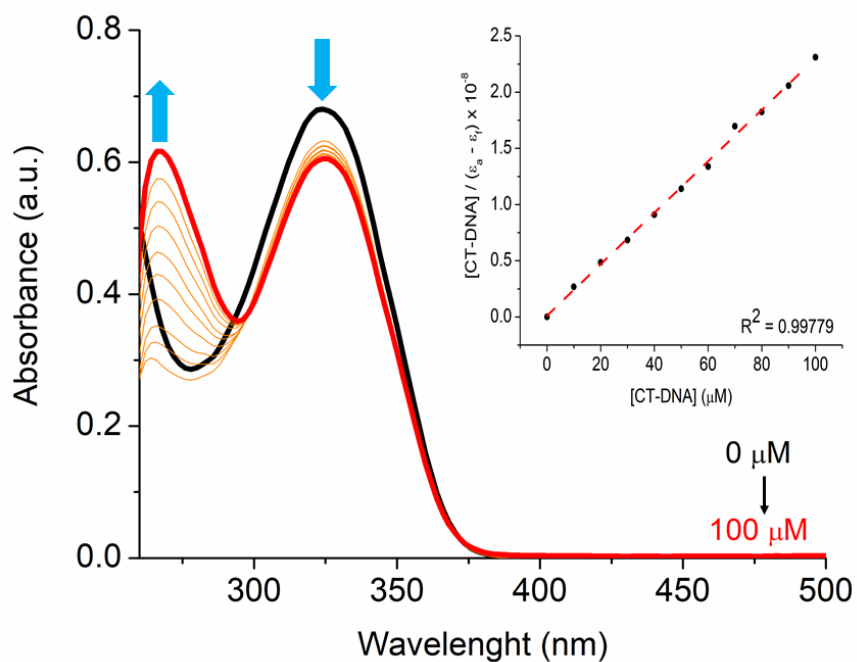

**Figure S40.** UV-Vis titration absorption spectra of derivative **7ae**, in a DMSO (2%)/Tris-HCl buffer (pH 7.2) solution. The concentration of CT-DNA ranged from 0 to 100  $\mu\text{M}$ . Insert graph shows the plot of  $[\text{DNA}]/(\epsilon_a - \epsilon_f)$  versus  $[\text{DNA}]$ .

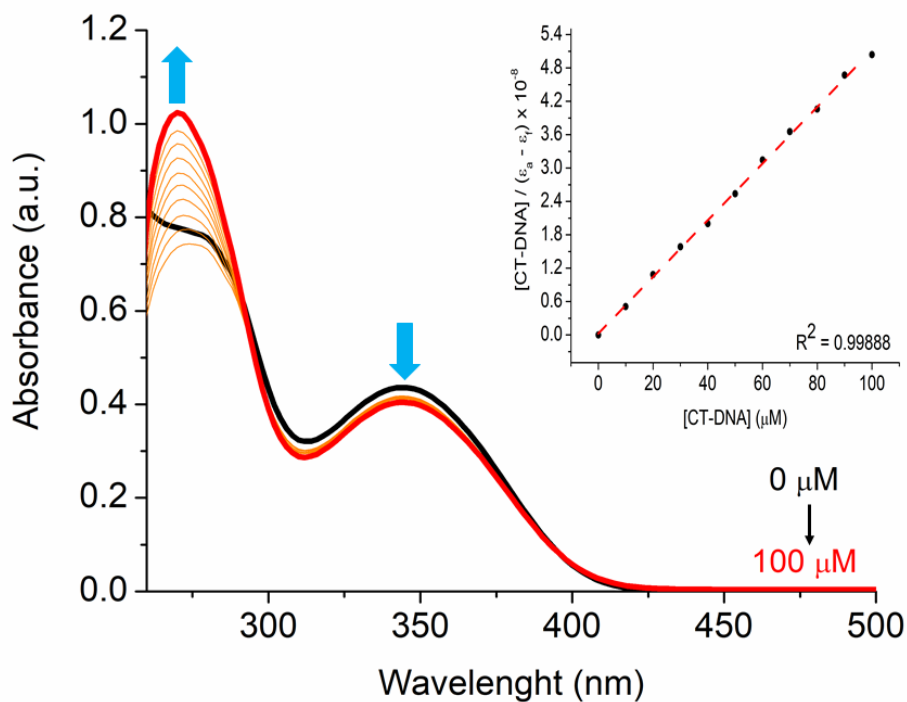

**Figure S41.** UV-Vis titration absorption spectra of derivative **7bb**, in a DMSO (2%)/Tris-HCl buffer (pH 7.2) solution. The concentration of CT-DNA ranged from 0 to 100  $\mu\text{M}$ . Insert graph shows the plot of  $[\text{DNA}]/(\epsilon_a - \epsilon_f)$  versus  $[\text{DNA}]$ .

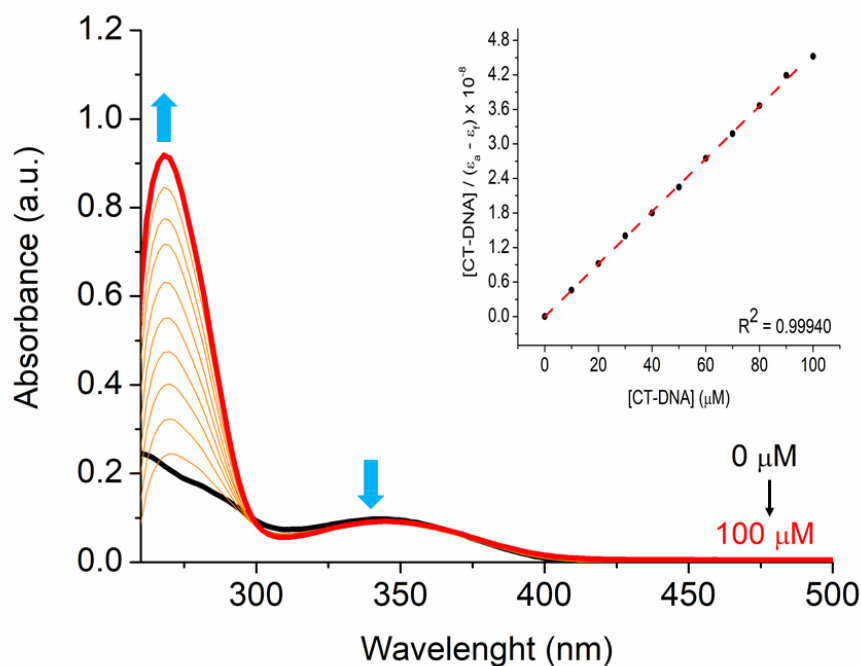

**Figure S42.** UV-Vis titration absorption spectra of derivative **7bc**, in a DMSO (2%)/Tris-HCl buffer (pH 7.2) solution. The concentration of CT-DNA ranged from 0 to 100  $\mu\text{M}$ . Insert graph shows the plot of  $[\text{DNA}]/(\epsilon_a - \epsilon_f)$  versus  $[\text{DNA}]$ .

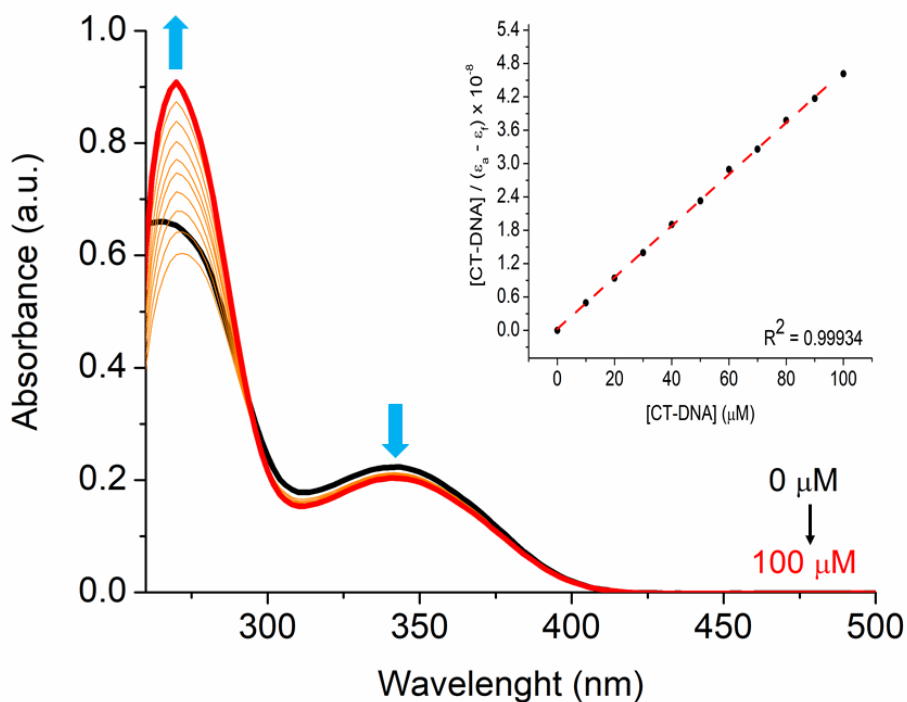

**Figure S43.** UV-Vis titration absorption spectra of derivative **7bd**, in a DMSO (2%)/Tris-HCl buffer (pH 7.2) solution. The concentration of CT-DNA ranged from 0 to 100  $\mu\text{M}$ . Insert graph shows the plot of  $[\text{DNA}]/(\epsilon_a - \epsilon_f)$  versus  $[\text{DNA}]$ .



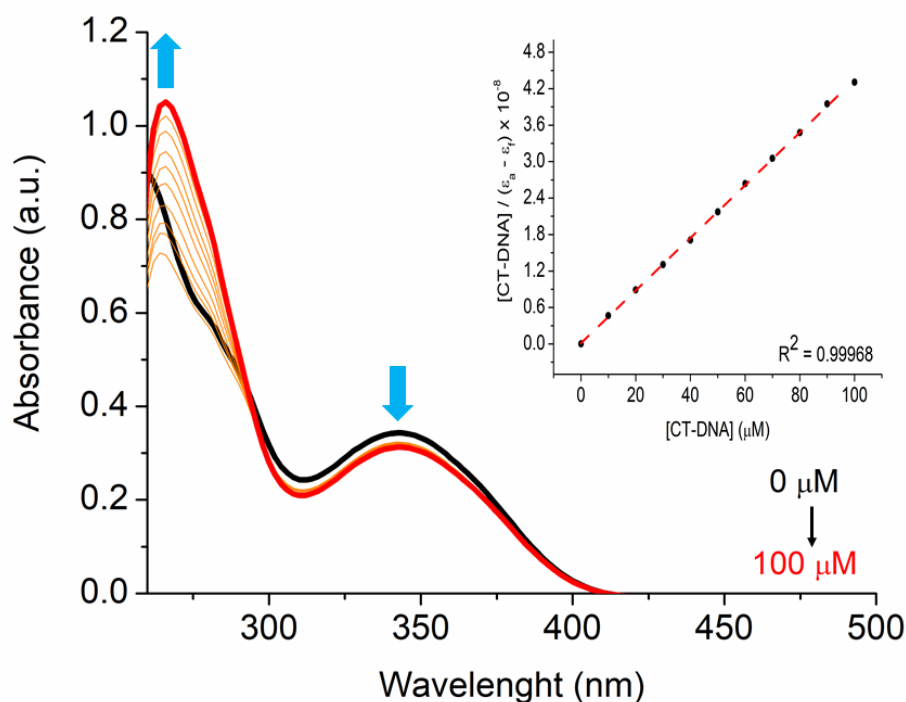

**Figure S44.** UV-Vis titration absorption spectra of derivative **7be**, in a DMSO (2%)/Tris-HCl buffer (pH 7.2) solution. The concentration of CT-DNA ranged from 0 to 100  $\mu\text{M}$ . Insert graph shows the plot of  $[\text{DNA}]/(\epsilon_a - \epsilon_f)$  versus  $[\text{DNA}]$ .

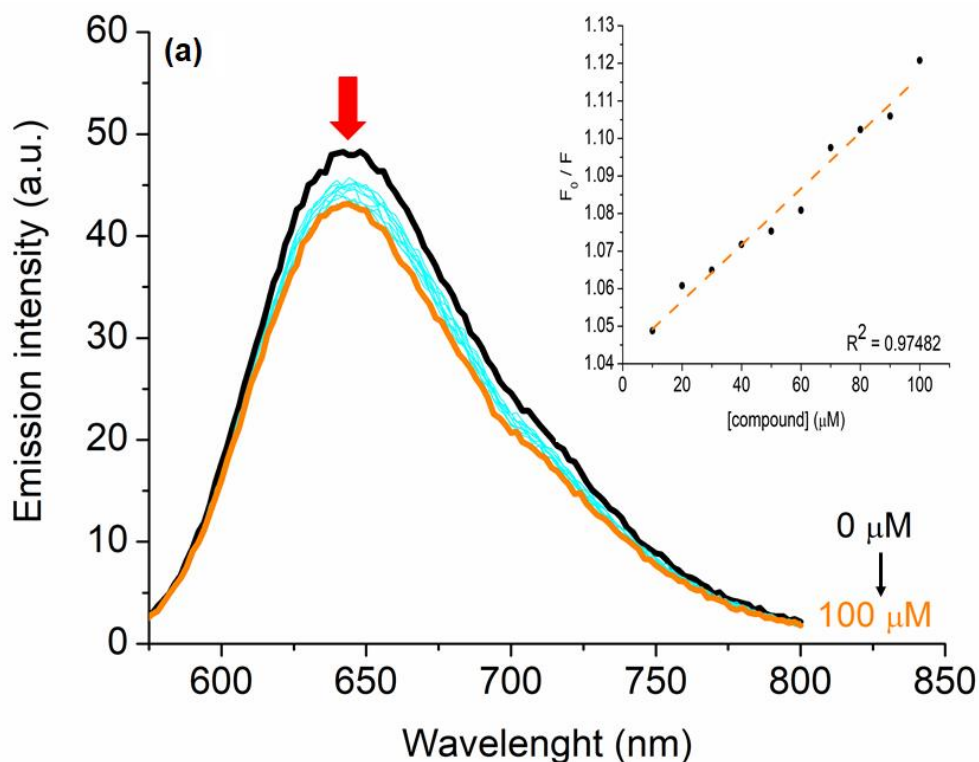

**Figure S45.** Competitive emission spectra of EB-DNA with derivative **7aa** in a DMSO (2%)/Tris-HCl buffer (pH 7.2) solution. The concentration of compound ranged from 0 to 100  $\mu\text{M}$ . Insert graph shows the plot of  $F_0/F$  versus  $[\text{compound}]$ .

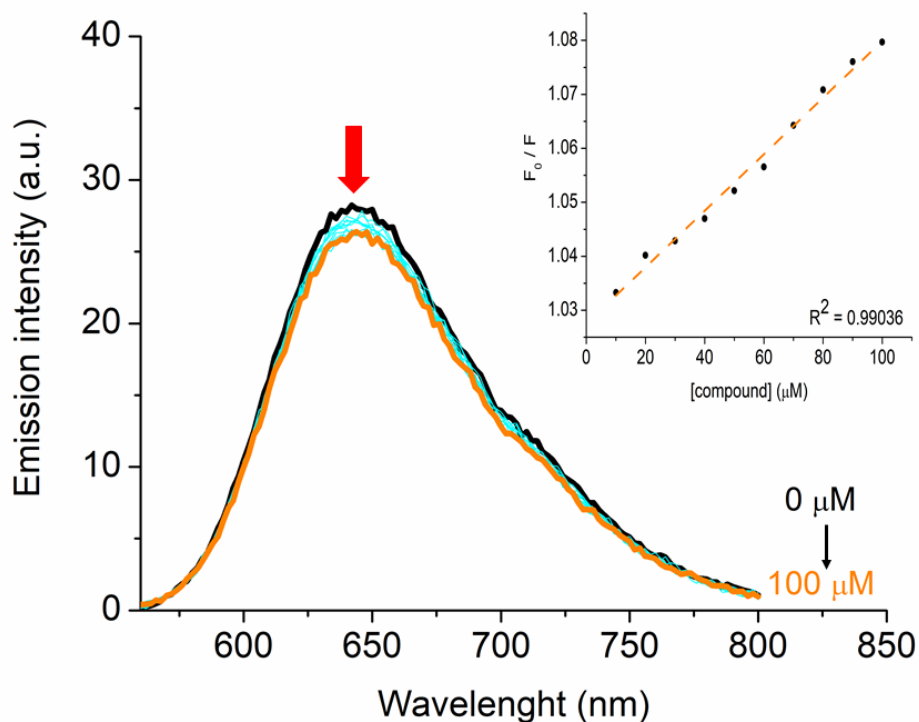

**Figure S46.** Competitive emission spectra of EB-DNA with derivative **7ab** in a DMSO (2%)/Tris-HCl buffer (pH 7.2) solution. The concentration of compound ranged from 0 to 100  $\mu\text{M}$ . Insert graph shows the plot of  $F_0/F$  versus [compound].

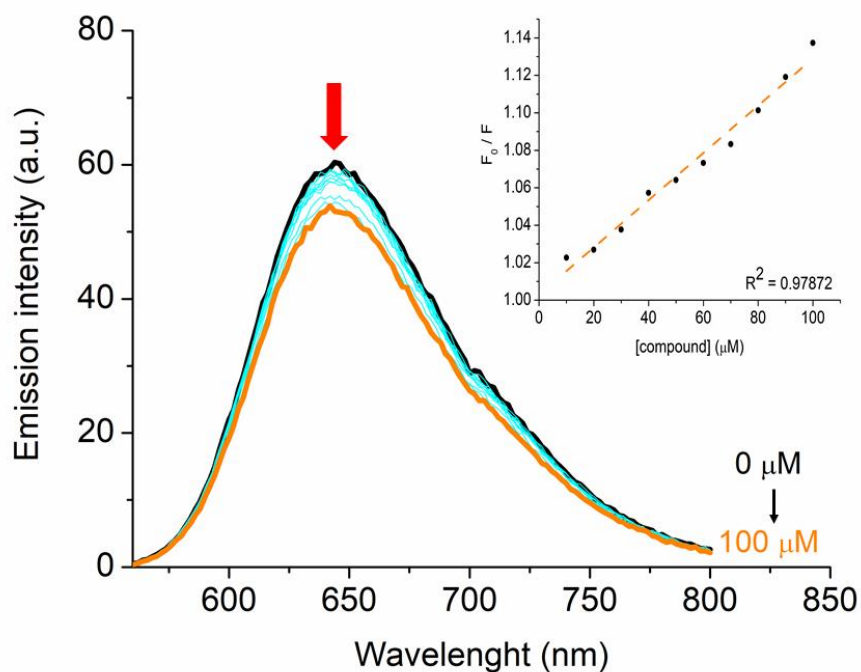

**Figure S47.** Competitive emission spectra of EB-DNA with derivative **7ac** in a DMSO (2%)/Tris-HCl buffer (pH 7.2) solution. The concentration of compound ranged from 0 to 100  $\mu\text{M}$ . Insert graph shows the plot of  $F_0/F$  versus [compound].

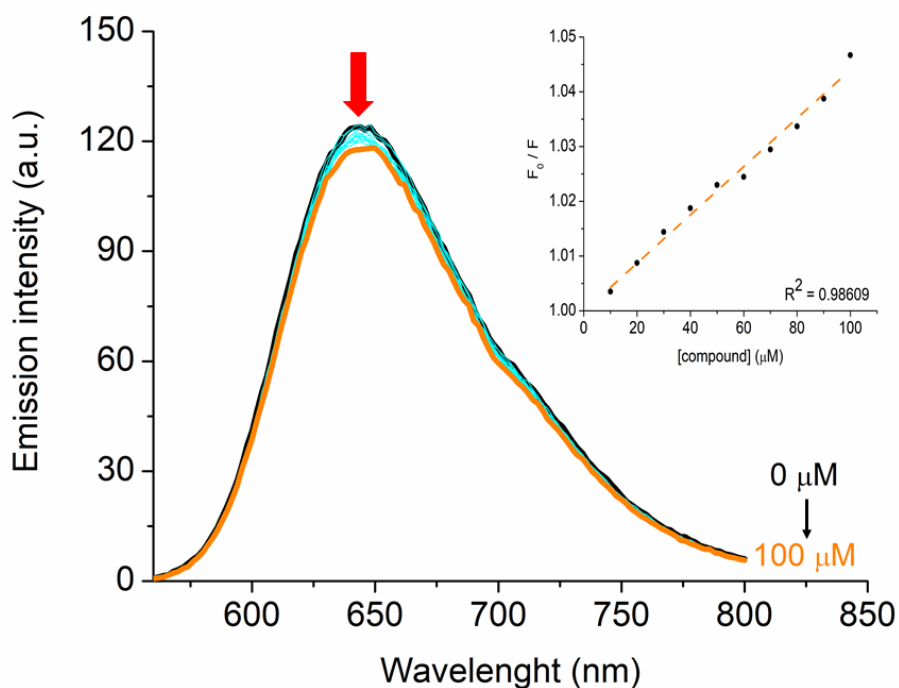

**Figure S48.** Competitive emission spectra of EB-DNA with derivative **7ad** in a DMSO (2%)/Tris-HCl buffer (pH 7.2) solution. The concentration of compound ranged from 0 to 100  $\mu\text{M}$ . Insert graph shows the plot of  $F_0/F$  versus [compound].

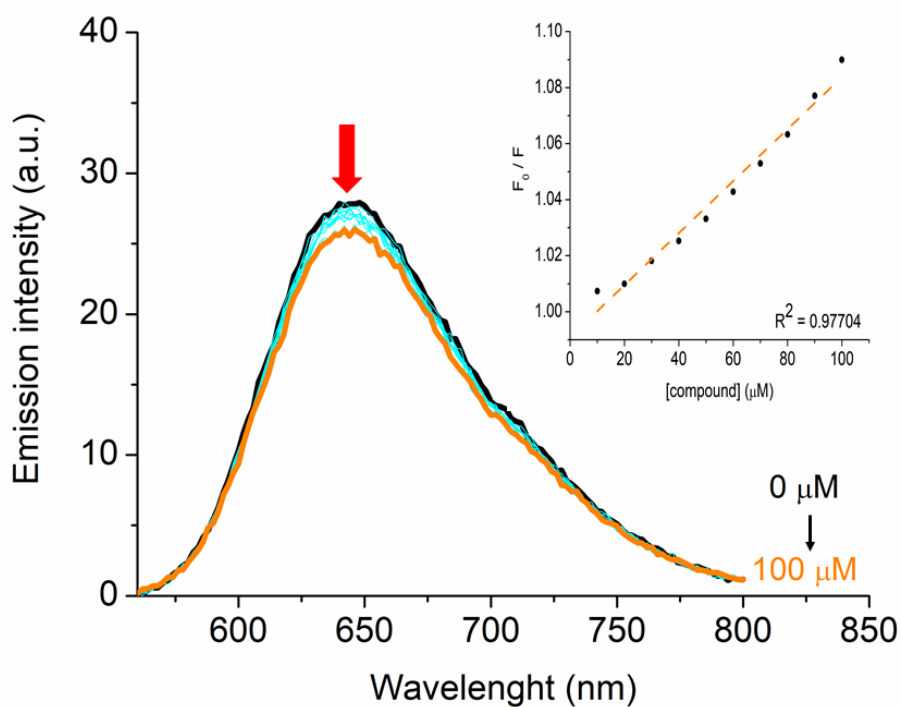

**Figure S49.** Competitive emission spectra of EB-DNA with derivative **7ae** in a DMSO (2%)/Tris-HCl buffer (pH 7.2) solution. The concentration of compound ranged from 0 to 100  $\mu\text{M}$ . Insert graph shows the plot of  $F_0/F$  versus [compound].

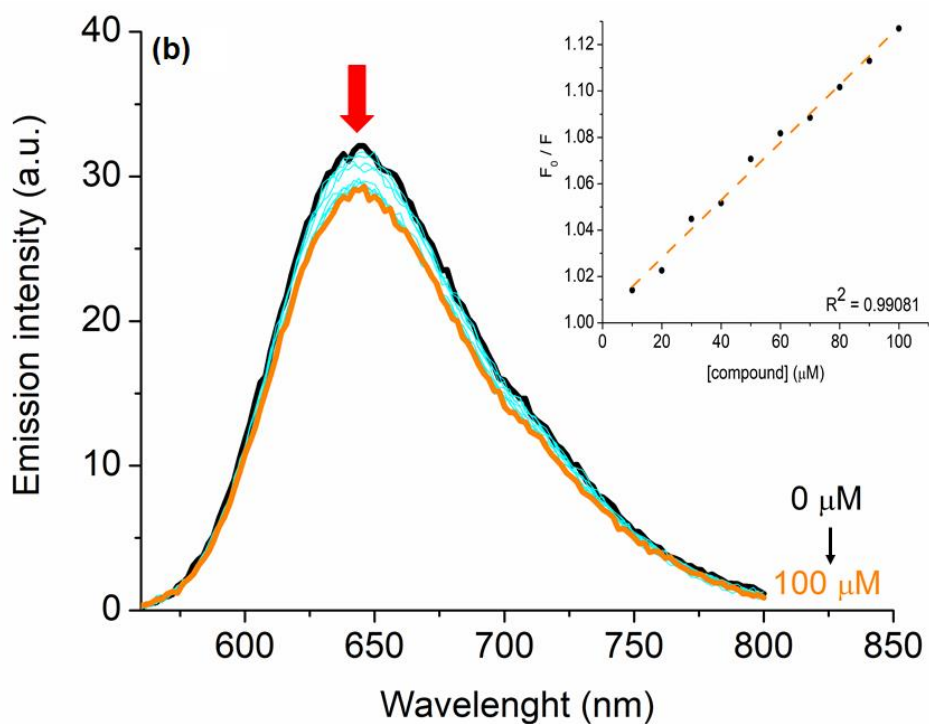

**Figure S50.** Competitive emission spectra of EB-DNA with derivative **7ba** in a DMSO (2%)/Tris-HCl buffer (pH 7.2) solution. The concentration of compound ranged from 0 to 100  $\mu\text{M}$ . Insert graph shows the plot of  $F_0/F$  versus [compound].

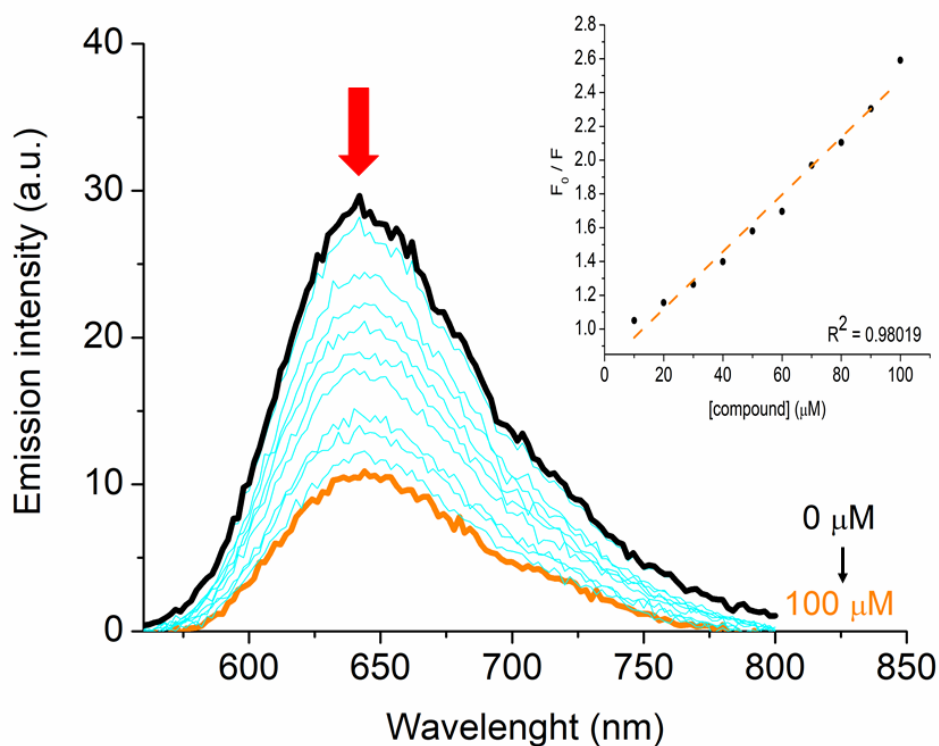

**Figure S51.** Competitive emission spectra of EB-DNA with derivative **7bb** in a DMSO (2%)/Tris-HCl buffer (pH 7.2) solution. The concentration of compound ranged from 0 to 100  $\mu\text{M}$ . Insert graph shows the plot of  $F_0/F$  versus [compound].

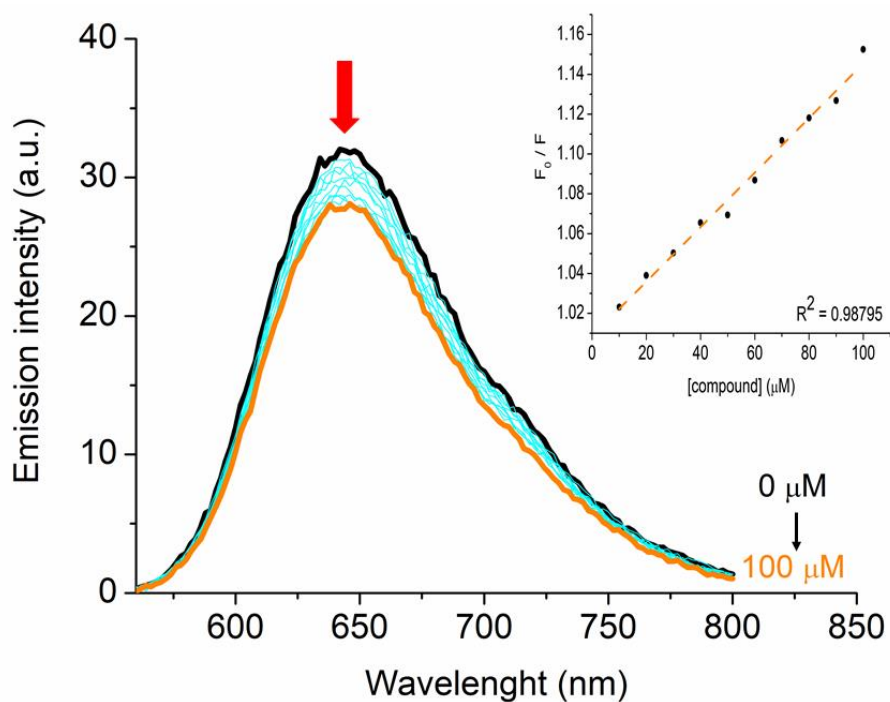

**Figure S52.** Competitive emission spectra of EB-DNA with derivative **7bc** in a DMSO (2%)/Tris-HCl buffer (pH 7.2) solution. The concentration of compound ranged from 0 to 100  $\mu\text{M}$ . Insert graph shows the plot of  $F_0/F$  versus [compound].

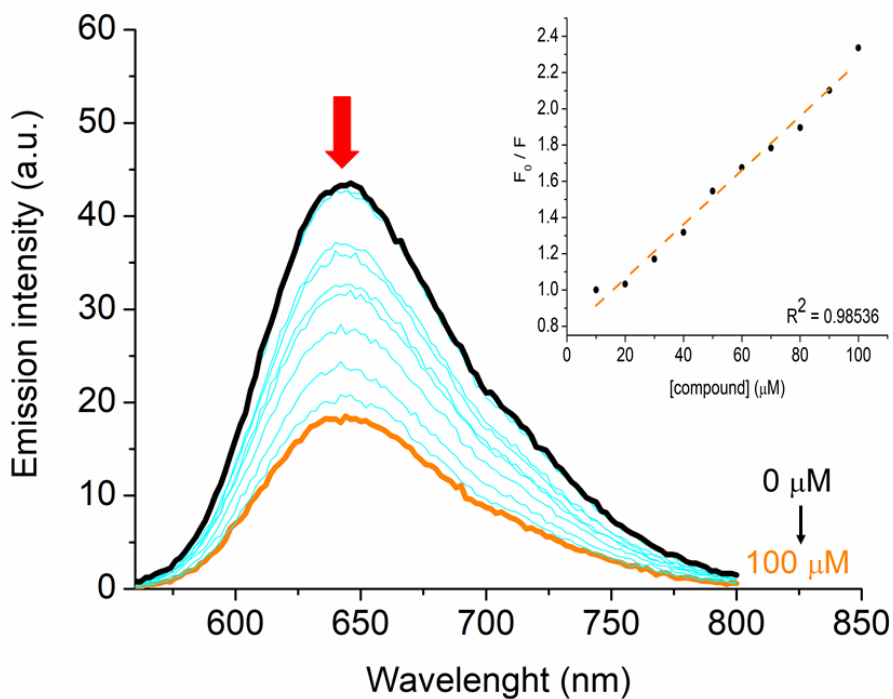

**Figure S53.** Competitive emission spectra of EB-DNA with derivative **7bd** in a DMSO (2%)/Tris-HCl buffer (pH 7.2) solution. The concentration of compound ranged from 0 to 100  $\mu\text{M}$ . Insert graph shows the plot of  $F_0/F$  versus [compound].

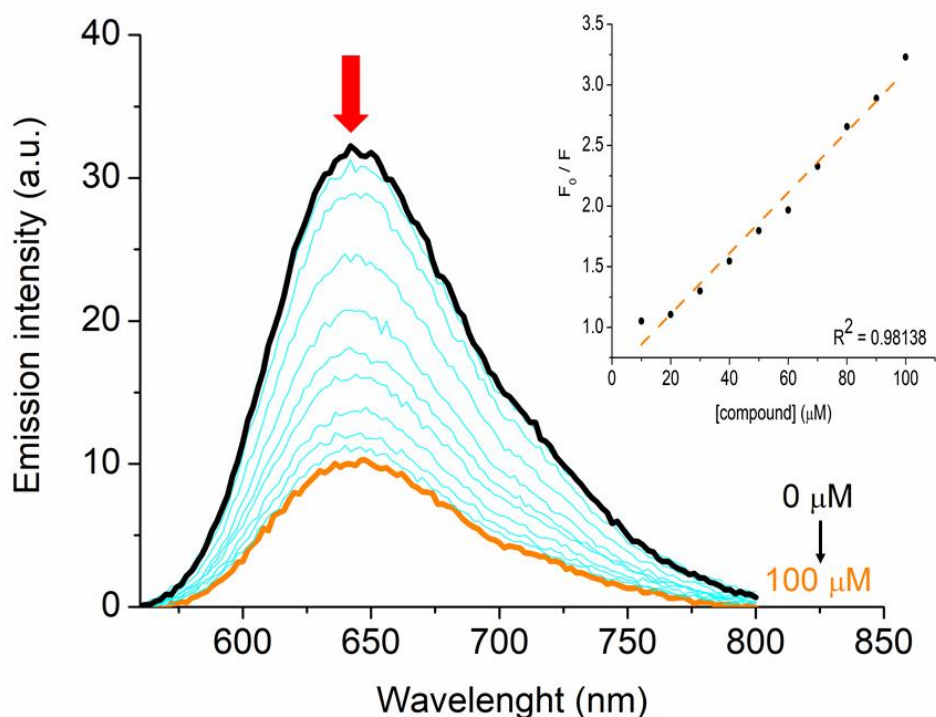

**Figure S54.** Competitive emission spectra of EB-DNA with derivative **7be** in a DMSO (2%)/Tris-HCl buffer (pH 7.2) solution. The concentration of compound ranged from 0 to 100  $\mu\text{M}$ . Insert graph shows the plot of  $F_0/F$  versus [compound].

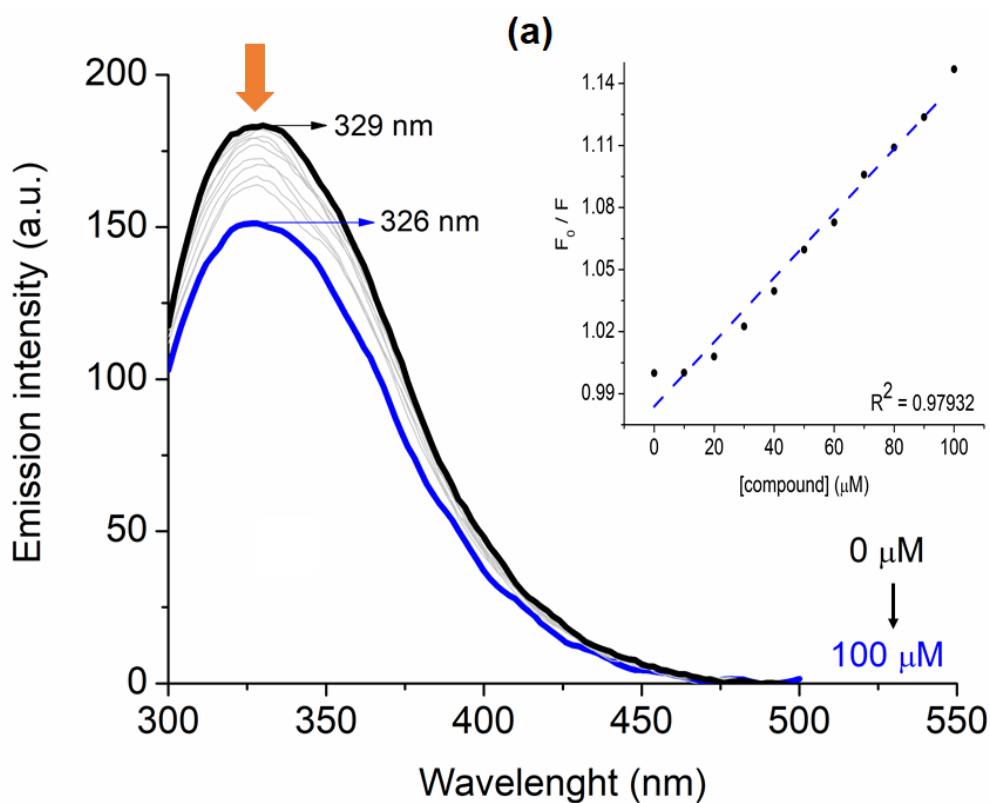

**Figure S55.** HSA-binding emission spectra with derivative **7aa** in a DMSO (2%)/Tris-HCl buffer (pH 7.2) solution. The concentration of compound ranged from 0 to 100  $\mu\text{M}$ . Insert graph shows the plot of  $F_0/F$  versus [compound].

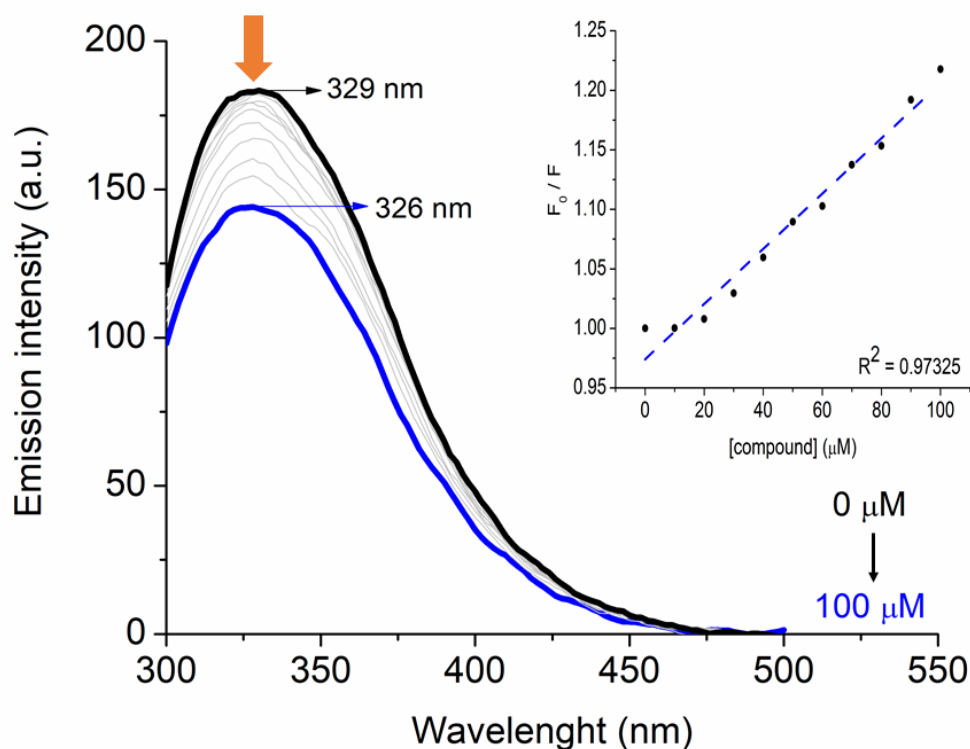

**Figure S56.** HSA-binding emission spectra with derivative **7ab** in a DMSO (2%)/Tris-HCl buffer (pH 7.2) solution. The concentration of compound ranged from 0 to 100  $\mu\text{M}$ . *Insert graph shows the plot of  $F_0/F$  versus [compound].*

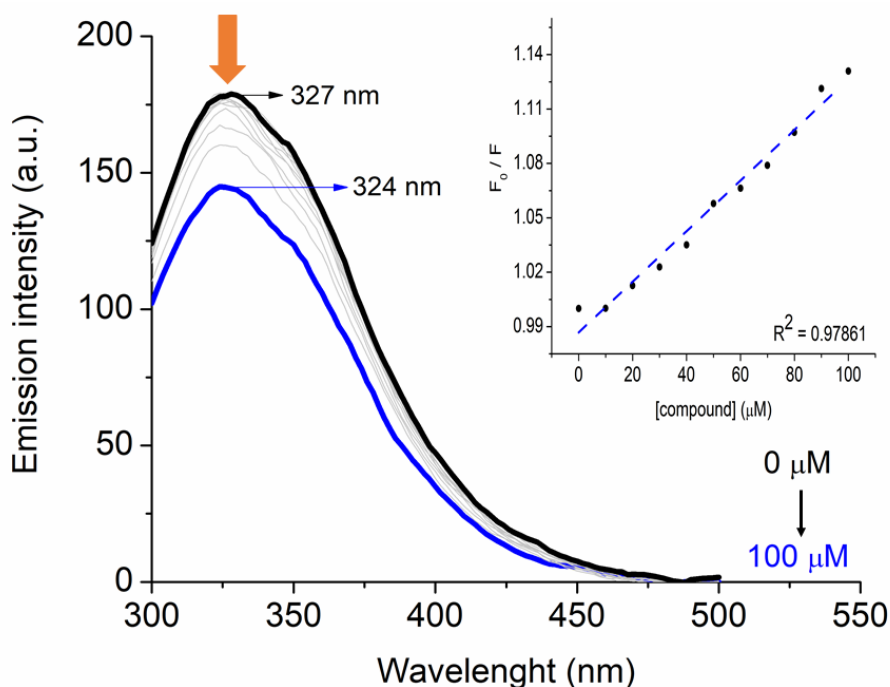

**Figure S57.** HSA-binding emission spectra with derivative **7ac** in a DMSO (2%)/Tris-HCl buffer (pH 7.2) solution. The concentration of compound ranged from 0 to 100  $\mu\text{M}$ . *Insert graph shows the plot of  $F_0/F$  versus [compound].*

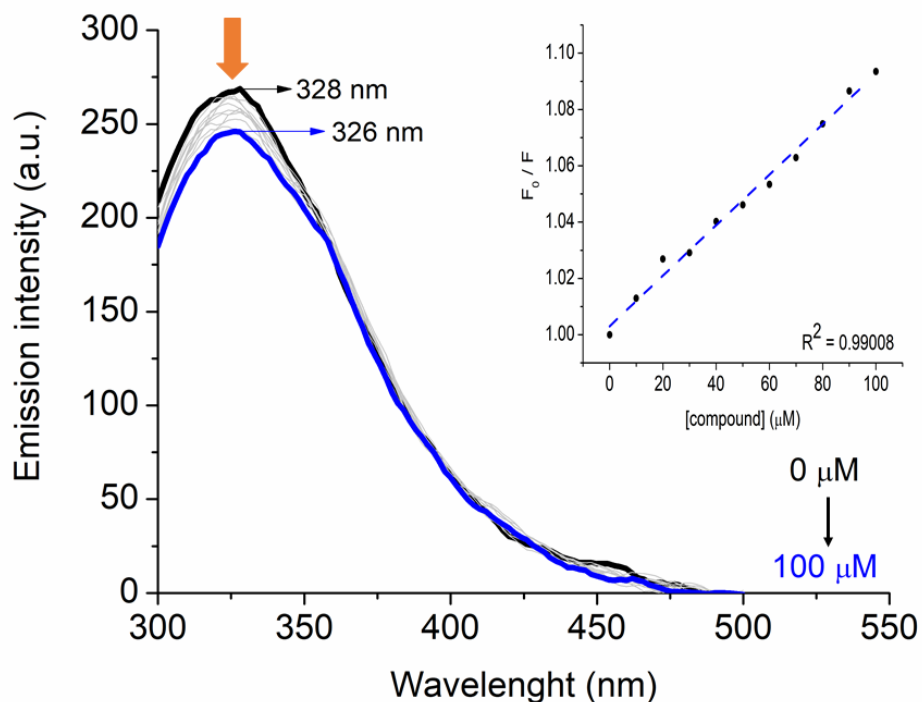

**Figure S58.** HSA-binding emission spectra with derivative **7ad** in a DMSO (2%)/Tris-HCl buffer (pH 7.2) solution. The concentration of compound ranged from 0 to 100  $\mu\text{M}$ . *Insert graph* shows the plot of  $F_0/F$  versus [compound].

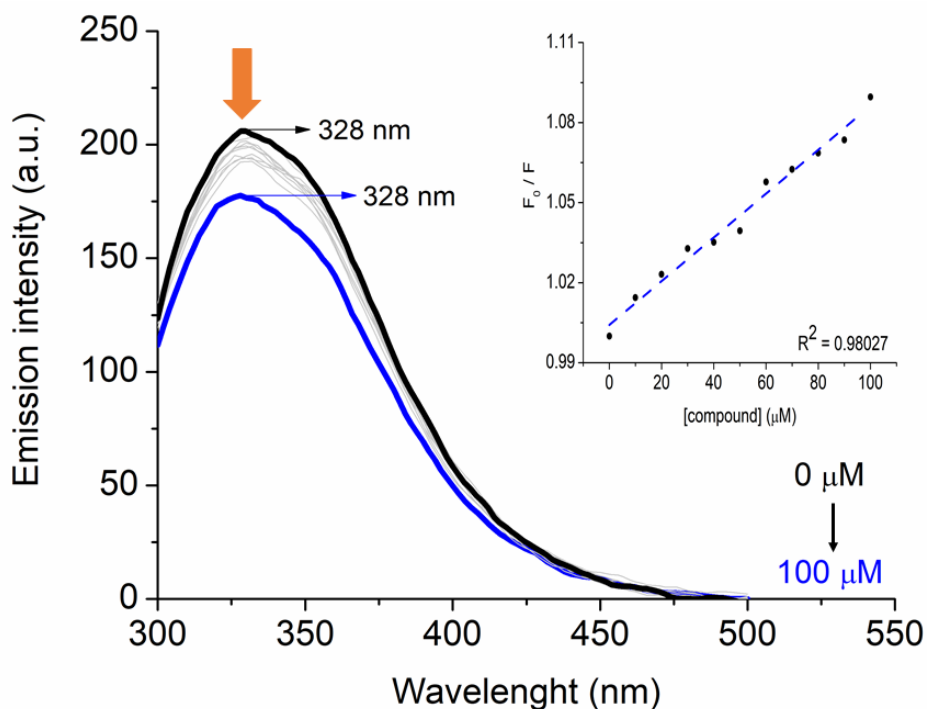

**Figure S59.** HSA-binding emission spectra with derivative **7ae** in a DMSO (2%)/Tris-HCl buffer (pH 7.2) solution. The concentration of compound ranged from 0 to 100  $\mu\text{M}$ . *Insert graph* shows the plot of  $F_0/F$  versus [compound].



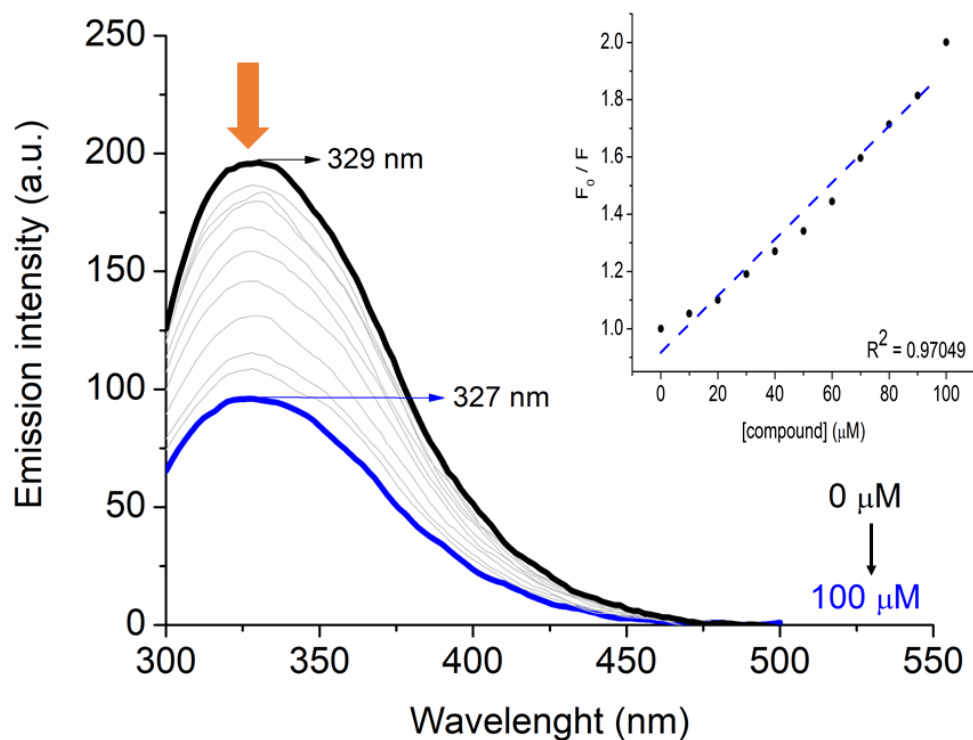

**Figure S60.** HSA-binding emission spectra with derivative **7bb** in a DMSO (2%)/Tris-HCl buffer (pH 7.2) solution. The concentration of compound ranged from 0 to 100  $\mu\text{M}$ . *Insert graph shows the plot of  $F_0/F$  versus [compound].*

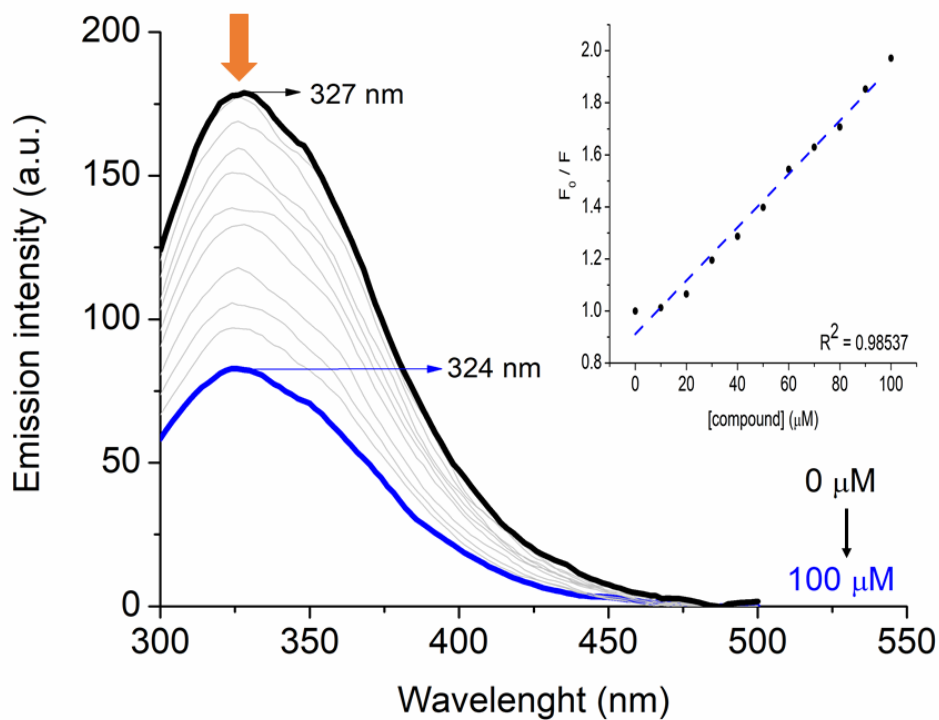

**Figure S61.** HSA-binding emission spectra with derivative **7bc** in a DMSO (2%)/Tris-HCl buffer (pH 7.2) solution. The concentration of compound ranged from 0 to 100  $\mu\text{M}$ . *Insert graph shows the plot of  $F_0/F$  versus [compound].*

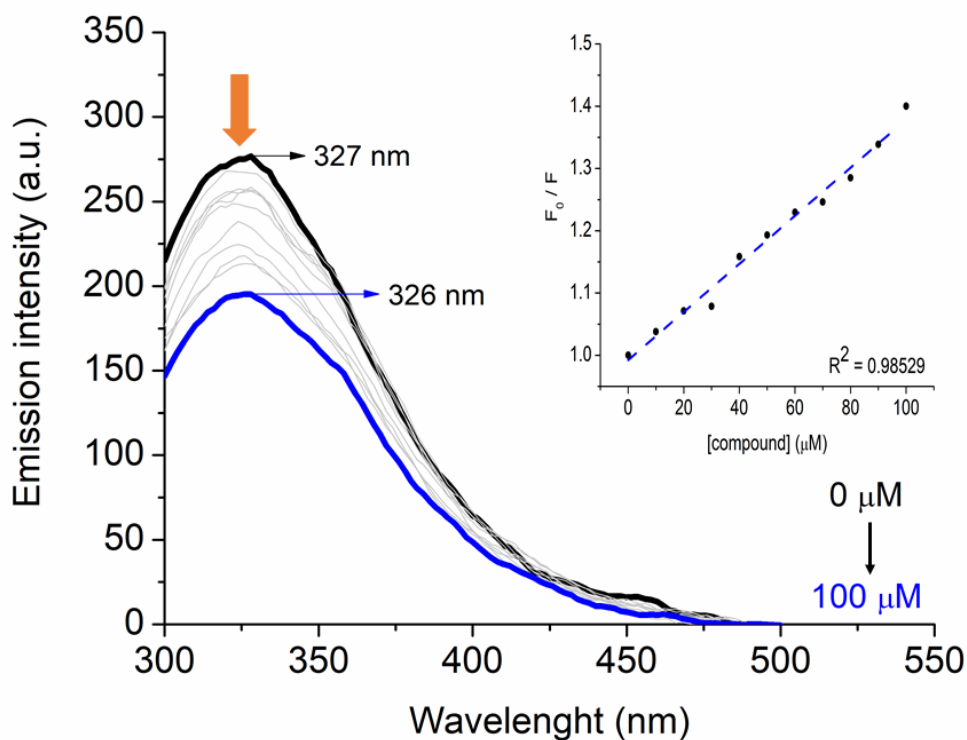

**Figure S62.** HSA-binding emission spectra with derivative **7bd** in a DMSO (2%)/Tris-HCl buffer (pH 7.2) solution. The concentration of compound ranged from 0 to 100  $\mu\text{M}$ . *Insert graph shows the plot of  $F_0/F$  versus [compound].*

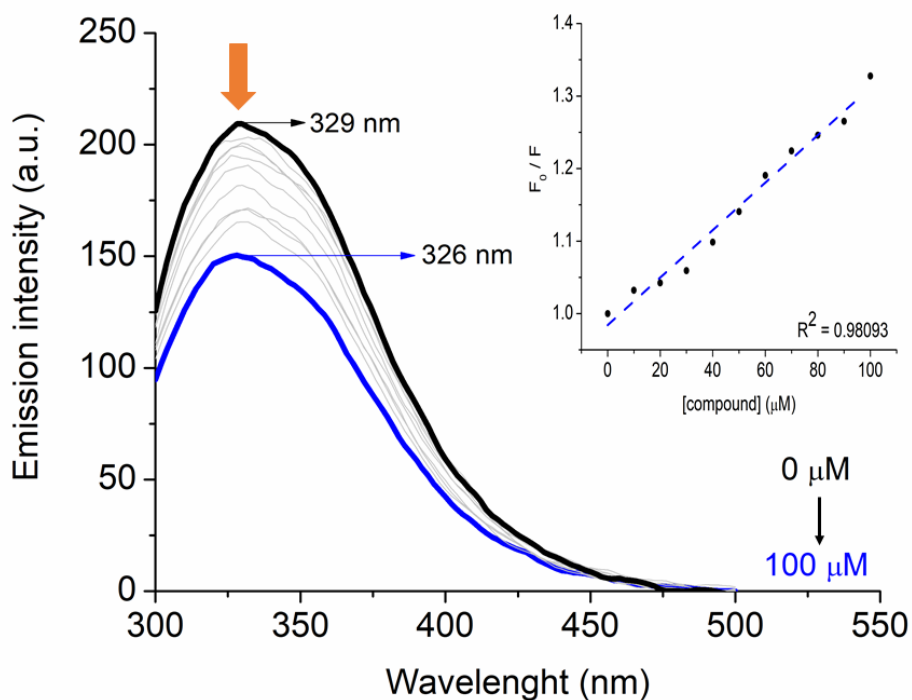

**Figure S63.** HSA-binding emission spectra with derivative **7be** in a DMSO (2%)/Tris-HCl buffer (pH 7.2) solution. The concentration of compound ranged from 0 to 100  $\mu\text{M}$ . *Insert graph shows the plot of  $F_0/F$  versus [compound].*

**Table S3.** The main nucleobases and interactions involved in the association DNA:**7aa-ae** and DNA:**7ba-be** in the minor groove.

| Compound          | Nucleobase | Interaction   | Distance (Å) |
|-------------------|------------|---------------|--------------|
| <b>7aa-ac, ae</b> | DG-04      | Van der Waals | 2.30         |
|                   | DA-05      | Van der Waals | 2.10         |
|                   | DA-06      | Van der Waals | 2.70         |
|                   | DT-07      | Van der Waals | 2.40         |
|                   | DT-08      | Van der Waals | 2.30         |
|                   | DA-17      | Van der Waals | 2.80         |
|                   | DA-18      | Van der Waals | 1.70         |
|                   | DT-19      | Van der Waals | 2.90         |
|                   | DT-20      | Van der Waals | 3.30         |
|                   | DC-21      | Van der Waals | 3.40         |
| <b>7ad</b>        | DA-06      | Van der Waals | 2.00         |
|                   | DT-07      | Van der Waals | 2.70         |
|                   | DT-08      | Van der Waals | 2.40         |
|                   | DA-18      | Van der Waals | 2.50         |
|                   | DT-19      | Van der Waals | 2.40         |
|                   | DT-20      | Van der Waals | 3.00         |
| <b>7ba, bc</b>    | DA-05      | Van der Waals | 3.40         |
|                   | DA-06      | Van der Waals | 2.20         |
|                   | DT-07      | Van der Waals | 2.40         |
|                   | DT-08      | Van der Waals | 2.30         |
|                   | DC-09      | Van der Waals | 2.50         |
|                   | DG-16      | Van der Waals | 2.80         |
|                   | DA-17      | Van der Waals | 2.80         |
|                   | DA-18      | Van der Waals | 2.70         |
|                   | DT-19      | Van der Waals | 3.00         |
|                   | DT-20      | Van der Waals | 2.50         |
| <b>7bb</b>        | DA-06      | Van der Waals | 3.10         |
|                   | DT-07      | Van der Waals | 2.60         |
|                   | DC-09      | Van der Waals | 2.50         |
|                   | DG-16      | Van der Waals | 1.70         |
|                   | DA-17      | Van der Waals | 3.00         |
|                   | DA-18      | Van der Waals | 3.40         |
|                   | DT-19      | Van der Waals | 2.50         |
|                   | DT-19      | Van der Waals | 2.50         |
| <b>7bd, be</b>    | DC-03      | Van der Waals | 3.10         |
|                   | DG-04      | Van der Waals | 2.10         |
|                   | DA-05      | Van der Waals | 2.60         |
|                   | DA-06      | Van der Waals | 1.50         |
|                   | DT-07      | Van der Waals | 2.30         |
|                   | DT-08      | Van der Waals | 3.00         |
|                   | DA-18      | Van der Waals | 2.50         |
|                   | DT-19      | Van der Waals | 2.80         |

|           |       |                  |      |
|-----------|-------|------------------|------|
|           | DT-20 | Van der Waals    | 2.90 |
|           | DC-21 | Van der Waals    | 3.60 |
|           | DG-22 | Van der Waals    | 2.00 |
| <b>EB</b> | DA-06 | Van der Waals    | 3.60 |
|           | DT-07 | Van der Waals    | 2.00 |
|           | DT-08 | Hydrogen bonding | 2.90 |
|           | DA-17 | Van der Waals    | 3.60 |
|           | DA-18 | Van der Waals    | 1.40 |
|           | DT-19 | Van der Waals    | 2.40 |

**Table S4.** The main amino acid residues and interactions involved in the association HSA:**7aa-ae** and HSA:**7ba-be** in the site II (subdomain IIIA).

| Compound      | Amino acid residue | Interaction      | Distance (Å) |
|---------------|--------------------|------------------|--------------|
| <b>7aa-ac</b> | Ile-388            | Van der Waals    | 1.30         |
|               | Tyr-411            | Hydrogen bonding | 2.10         |
|               | Lys-414            | Van der Waals    | 2.80         |
|               | Val-415            | Van der Waals    | 2.30         |
|               | Val-433            | Van der Waals    | 3.30         |
|               | Cys-437            | Van der Waals    | 2.50         |
|               | Leu-453            | Van der Waals    | 2.40         |
|               | Leu-457            | Van der Waals    | 3.00         |
|               | Leu-460            | Van der Waals    | 2.80         |
|               | Phe-488            | Van der Waals    | 3.60         |
|               | Ser-489            | Hydrogen bonding | 1.90         |
| <b>7ad/ae</b> | Ile-388            | Van der Waals    | 1.50         |
|               | Tyr-411            | Hydrogen bonding | 2.10         |
|               | Leu-430            | Van der Waals    | 2.10         |
|               | Val-433            | Van der Waals    | 2.80         |
|               | Cys-437            | Van der Waals    | 2.10         |
|               | Leu-460            | Van der Waals    | 2.50         |
|               | Phe-488            | Van der Waals    | 3.60         |
|               | Ser-489            | Van der Waals    | 2.00         |
| <b>7ba-be</b> | Leu-387            | Van der Waals    | 2.90         |
|               | Ile-388            | Van der Waals    | 1.30         |
|               | Tyr-411            | Hydrogen bonding | 2.10         |
|               | Val-415            | Van der Waals    | 1.90         |
|               | Val-418            | Van der Waals    | 1.30         |
|               | Val-426            | Van der Waals    | 1.30         |
|               | Leu-430            | Van der Waals    | 2.10         |
|               | Val-433            | Van der Waals    | 1.70         |
|               | Gly-434            | Van der Waals    | 1.90         |
|               | Arg-485            | Hydrogen bonding | 2.70         |
